1 **Protein phosphatase 1 regulates huntingtin exon 1 aggregation and toxicity**

2

3 Joana Branco-Santos<sup>1,2,3¶</sup>, Federico Herrera<sup>1¶\*</sup>, Gonçalo M. Poças<sup>2,#a</sup>, Yolanda Pires-

4 Afonso<sup>2,#b</sup>, Flaviano Giorgini<sup>3</sup>, Pedro M. Domingos<sup>2\*</sup> and Tiago F. Outeiro<sup>4,5\*</sup>

5

6 <sup>1</sup>Laboratory of Cell Structure and Dynamics, Instituto de Tecnologia Química e  
7 Biológica, Oeiras, Portugal

8 <sup>2</sup>Laboratory of Cell Signaling in Drosophila, Instituto de Tecnologia Química e  
9 Biológica, Oeiras, Portugal

10 <sup>3</sup>Department of Genetics, University of Leicester, Leicester, United Kingdom

11 <sup>4</sup>Department of Experimental Neurodegeneration, Center for Nanoscale Microscopy  
12 and Molecular Physiology of the Brain, Center for Biostructural Imaging of  
13 Neurodegeneration, University Medical Center Gottingen, Göttingen, Germany

14 <sup>5</sup>Max Planck Institute for Experimental Medicine, Göttingen, Germany

15 <sup>#a</sup>Current Address: School of Biological Sciences, Monash University, Clayton,  
16 Victoria, Australia

17 <sup>#b</sup>Current Address: Department of Oncology, Luxembourg Institute of Health,  
18 University of Luxembourg, Esch-Belval, Luxembourg

19

20 <sup>¶</sup>These authors contributed equally to this work.

21

22 \*Co-corresponding authors:

23 [touteir@gwdg.de](mailto:touteir@gwdg.de) (TFO)

24 [fherrera@itqb.unl.pt](mailto:fherrera@itqb.unl.pt) (FH)

25 [domingp@itqb.unl.pt](mailto:domingp@itqb.unl.pt) (PMD)

26

27 Running title: PP1 and HTTex1 aggregation

## 28 **Abstract**

29           Huntington's disease (HD) is neurodegenerative disorder caused by a  
30 polyglutamine expansion in the N-terminal region of the huntingtin protein (N17).  
31 Here, we analysed the relative contribution of each phosphorylatable residue in the  
32 N17 region (T3, S13 and S16) towards huntingtin exon 1 (HTTex1) oligomerization,  
33 aggregation and toxicity in human cells and *Drosophila* neurons. We used  
34 bimolecular fluorescence complementation (BiFC) to show that expression of single  
35 phosphomimic mutations completely abolished HTTex1 aggregation in human cells.  
36 In *Drosophila*, Mimicking phosphorylation at T3 decreased HTTex1 aggregation both  
37 in larvae and adult flies. Interestingly, pharmacological or genetic inhibition of protein  
38 phosphatase 1 (PP1) prevented HTTex1 aggregation in both human cells and  
39 *Drosophila* while increasing neurotoxicity in flies. Our findings suggest that PP1  
40 modulates HTTex1 aggregation by regulating phosphorylation on T3. In summary,  
41 our study suggests that modulation of HTTex1 single phosphorylation events by PP1  
42 could constitute an efficient and direct molecular target for therapeutic interventions  
43 in HD.

44 **Keywords:** Huntington's disease/ aggregation/ huntingtin/ phosphorylation/ PP1

45

## 46 **Introduction**

47           Huntington's disease (HD) is characterized by the loss of medium spiny neurons  
48 in the striatum. The main histopathological hallmark of HD is the misfolding and  
49 subsequent intracellular aggregation of a mutant form of huntingtin (HTT) [1]. HTT is  
50 a very large protein (~350 kDa), but expression of exon 1 is sufficient to produce HD-  
51 like features in various cellular and animal models [2-4]. HTT exon 1 (HTTex1)  
52 contains a polyglutamine (polyQ) tract that, in normal conditions, is constituted by 6

53 to 35 glutamine residues. An expansion of the polyQ tract beyond 35 glutamines  
54 induces the misfolding and aggregation of mutant HTT and causes HD [5,6]. Mutant  
55 HTT with longer polyQ expansions is more prone to aggregate, and leads to earlier  
56 onset of the disease [2,7,8].

57 The polyQ tract is preceded by an N-terminal sequence of 17 amino acids (N17  
58 domain) that is highly conserved, suggesting that this domain plays an important role  
59 in the function of HTT [9-15]. The N17 domain plays a key role in the aggregation  
60 pathway of HTT, where the protein associates first into alpha-helical oligomers and  
61 acts as a seed to concentrate and facilitate the formation of larger aggregates and  
62 fibrils [16-20]. Deletion or posttranslational modifications such as phosphorylation,  
63 ubiquitination and SUMOylation in the N17 produce striking effects in the stability  
64 and aggregation of HTT, as well as in cell viability [21-34]. The N17 domain has 3  
65 phosphorylatable amino acid residues – threonine at position 3 (T3), and serine  
66 residues at positions 13 and 16 (S13 and S16). Constitutive phosphorylation of T3  
67 enhances mutant HTT aggregation, but its role in HTT toxicity remains unclear [29].  
68 Previous studies have focused on double S13/S16 phosphorylation [30,31,35-38],  
69 despite the fact that double S13/S16 phosphorylation is less frequent than single T3 or  
70 S13 phosphorylation [39,40], and that overexpression of particular kinases is required  
71 in order to achieve double S13/S16 phosphorylation [30].

72 Single phosphorylation and phosphomimetic modifications in S13 or S16  
73 modulates the formation of HTT fibrils and reduces the oligomerization rate in cell-  
74 free systems, just as the double S13/S16 phosphorylation does, both *in vitro* and *in*  
75 *vivo* [26,28,30,31]. Casein Kinase 2 (CK2) inhibitors reduce S13/S16 phosphorylation  
76 and enhance toxicity [37], while GM1 ganglioside induces S13/S16 phosphorylation  
77 and restores motor and molecular deficits in HD mice [36]. IKK, a kinase involved in

78 inflammatory responses, also regulates T3 and S13/S16 phosphorylation and  
79 modulates HTT aggregation [30,37,39,41]. While several protein phosphatases  
80 control HTT dephosphorylation beyond exon 1 and modulate its toxicity [42-46], it is  
81 not known which protein phosphatases, if any, regulate phosphorylation of the N17  
82 domain.

83 Here, we elucidate the contribution of single N17 phosphorylation events  
84 towards HTTex1 oligomerization, aggregation and toxicity. We screened a collection  
85 of protein phosphatase chemical inhibitors to identify modulators of HTTex1  
86 oligomerization and aggregation in human cells. Inhibition of PP1 prevents HTTex1  
87 aggregation but not oligomerization in human cells. In addition, downregulation of  
88 PP1 in *Drosophila* neurons reduces HTTex1 aggregation and increases its toxicity. In  
89 total, our findings point to a critical role of T3 phosphorylation in HTTex1  
90 aggregation and support the targeting of PP1 for therapeutic interventions in HD.

91

## 92 **Results**

### 93 **Single N17 phosphomutants modulate HTTex1 aggregation in human cells**

94 In order to investigate the contribution of each phosphorylatable residue within  
95 the N17 region (T3, S13 and S16) towards HTTex1 aggregation, we used the BiFC  
96 system for the visualization of both oligomeric species and inclusion bodies of  
97 HTTex1 in living cells, which we have previously described [47-49]. In this system,  
98 wild type (19Q) or disease-causing (97Q) HTTex1 are fused to non-fluorescent halves  
99 of the Venus fluorescent protein (Fig 1A). In this system, upon dimerization of  
100 HTTex1 fragments, the Venus halves are brought together and reconstitute the  
101 functional fluorophore. Therefore, fluorescence is proportional to the extent of  
102 HTTex1 dimerization/oligomerization. We introduced point mutations in each of the

103 phosphorylatable residues within the N17, changing these amino acids to either  
104 alanine (A mutants, which cannot be phosphorylated - phosphoresistant) or to aspartic  
105 acid (D mutants, which mimic the phosphorylated state - phosphomimic).  
106 Importantly, these phosphomutants behave like phosphorylated peptides in terms of  
107 their aggregation in cell-free systems and primary neuronal cultures [26,28].

108 We had previously shown that 97QHTTex1-Venus BiFC pairs oligomerize and  
109 aggregate more readily than wild-type 19QHTTex1-Venus BiFC pairs [49].  
110 Strikingly, all single phosphomimic mutations of 97QHTTex1-Venus BiFC constructs  
111 (T3D, S13D, S16D) completely abolished the formation of inclusion bodies in human  
112 cells (Fig 1B and C) while the phosphoresistant mutants (T3A, S13A, S16A) behaved  
113 similarly to non-mutated 97QHTTex1-Venus BiFC pairs (Fig 1B and C and S1 Fig).  
114 These phenotypes were further confirmed by filter trap assays, where non-mutated  
115 97QHTTex1 and phosphoresistant pairs appear as large SDS-insoluble aggregates, as  
116 opposed to wild-type 19QHTTex1 and phosphomimic pairs. (Fig 1D, filter trap (FT)).  
117 No differences in oligomerization/fluorescence levels were observed between the  
118 phosphomutants, and non-mutated 97QHTTex1, as determined by flow cytometry (S2  
119 Fig). Native-PAGE analyses confirmed that all phosphomutants formed oligomeric  
120 species (Fig 1D). These results are consistent with a recent report where expanded  
121 HTTex1 was shown to exist as tetramers but not monomers [50].

122 Due to its dynamic nature, phosphorylation usually affects only a fraction of the  
123 total pool of any given protein. Thus, we hypothesized that subpopulations or pools of  
124 97QHTTex1 with different extents of phosphorylation may co-exist in cells. In order  
125 to determine whether 97QHTTex1 fragments with different phosphorylation status  
126 interacted in living cells, we took advantage of the unique features of our BiFC  
127 system to screen all possible pairwise combinations of phosphomutants and non-

128 mutated 97QHTTex1 control (Table 1). Combinations of phosphomimic with non-  
129 mutated 97QHTTex1 oligomerized to the same extent as the non-mutated  
130 97QHTTex1 pair, as determined by flow cytometry (S3 Fig). However,  
131 phosphomimic pairs did not form inclusions, independently of the mutated residue  
132 (Table 1). Combinations of phosphomimics with non-mutated 97QHTTex1 (Table 1  
133 and Fig 2A and B) or phosphoresistant mutants (Table 1) resulted in intermediate  
134 aggregation phenotypes, depending on which residue was mutated. Combinations  
135 including T3D, S13D or S16D resulted in 0 %, 14.1-22.0 % or 19.8-29.1 % of cells  
136 with inclusions, respectively (Table 1), which is significantly less than the percentage  
137 of cells with inclusions observed with the non-mutated 97QHTTex1 pair (36.1%). In  
138 contrast, phosphoresistant pairs generally resulted in an increased percentage of cells  
139 displaying inclusions (43.5-48.5% cells with inclusions), with the exception of the  
140 S13A/S16A combination (35.3%) (Table 1).

141 Importantly, the effect of phosphomimic mutants on 97QHTTex1 aggregation  
142 appears to be protein-specific (Fig 2). We and others have recently shown that  
143 HTTex1 co-aggregates with alpha-synuclein (aSyn) and Tau, and that these  
144 interactions change the aggregation profile of HTTex1 [47,48,51,52]. Combinations  
145 of phosphomimic 97QHTTex1 with aSyn BiFC constructs resulted in a residue-  
146 dependent reduction in the percentage of cells with inclusions, with the T3D/Syn  
147 showing no inclusions (Fig 2A, C). On the other hand, combinations of Tau-Venus  
148 plasmids showed the same aggregation pattern independently of the mutated residue  
149 (Fig 2A, D). These observations further support that single N17 phosphomutants  
150 modulate HTTex1 aggregation, and that the T3D is the most restrictive modification  
151 in preventing HTTex1 aggregation.

152

153 **Increased dynamics of 97QHTTex1 inclusions containing S13 or S16**  
154 **phosphomimic mutants**

155 We next analysed the dynamics of 97QHTTex1 inclusions using fluorescence  
156 recovery after photobleaching (FRAP). We observed a faster fluorescence recovery in  
157 inclusions formed by pairs containing phosphomimic mutants (S13D or S16D) and  
158 non-mutated 97QHTTex1 in comparison to inclusions formed exclusively by non-  
159 mutated 97QHTTex1 (Fig 3A and 3B, S1-S3 Videos). The phosphoresistant (T3A or  
160 S13A)/97QHTTex1 pairs, but not the S16A/97QHTTex1, presented slower  
161 fluorescence recovery in inclusions (Fig 3C). Phosphomimic-containing inclusions  
162 often had less defined boundaries, appearing rather continuous with the cytosolic  
163 fluorescence, consistent with areas of more dynamic exchange of HTT protein.  
164 Inclusions formed by the S13D/97QHTTex1 combination (Fig 3D and S4 Video)  
165 showed a fluid-like behaviour as opposed to the more rigid behaviour of the  
166 inclusions formed by combinations containing phosphoresistant mutants (S5 Video)  
167 or non-mutated 97QHTTex1 BiFC pairs (S6 Video).

168 Overall, the results suggest that single phosphorylation events within N17 domain  
169 prevent HTTex1 aggregation but not its oligomerization, and that phosphorylation at  
170 the T3 residue might play a critical role in modulating HTTex1 aggregation. In  
171 addition, our observations support the idea that inclusions might be composed of non-  
172 phosphorylated HTT or mixtures of non-phosphorylated and phosphorylated pools of  
173 molecules, consistent with data indicating that disease-causing HTT is  
174 hypophosphorylated in the N17 region [29,37].

175

176 **Protein phosphatases regulate HTTex1 aggregation in human cells**

177       The results above indicate that single N17 phosphorylation can modulate HTTex1  
178 aggregation, which is consistent with the idea that N17 phosphorylation might be  
179 enhanced by the activation of kinases [30,37,39] or, alternatively, by the inhibition of  
180 phosphatases. In order to identify protein phosphatases that might mediate HTTex1  
181 dephosphorylation, we screened a library of 33 phosphatase chemical inhibitors for  
182 their effect on HTTex1 aggregation and oligomerization, using our 97QHTTex1-  
183 Venus BiFC system (Fig 4, and S1 Table). We found that inhibitors of PP1/PP2A,  
184 CD45, and Cdc25 prevented 97QHTTex1 aggregation as determined by filter trap  
185 assay (Fig 4A). These results were confirmed by fluorescence microscopy, where we  
186 observed that inhibitors for those phosphatases significantly decreased the percentage  
187 of cells with inclusions (Fig 4B). Interestingly, the decrease in oligomerization upon  
188 treatment with these phosphatase inhibitors was much less dramatic than the reduction  
189 observed in aggregation levels (B01, B02, B07, B08 and C04). Although a slight  
190 reduction in fluorescence/oligomerization was observed for 28 out of the 33 inhibitors  
191 assayed, the few exceptions where a striking decrease was observed (C06, D01 and  
192 D03) were due to cytotoxicity (S1 Table). Importantly, cells treated with CD45  
193 inhibitors showed reduced levels of HTTex1 expression and increased toxicity (S1  
194 Table), and were therefore excluded from the study.

195

### 196 **Single N17 phosphomutants modulate HTTex1 aggregation in *Drosophila***

197       To further investigate the role of N17 phosphorylation on HTTex1 aggregation,  
198 we expressed single phosphoresistant or phosphomimic versions of 97QHTTex1 in  
199 *Drosophila* and assessed for the formation of inclusions. We generated flies  
200 expressing different phosphomutant versions of 97QHTTex1 fused to mCherry in  
201 adult dopaminergic neurons, under the control of TH-GAL4 (Fig 5, columns 1-3), or



202 in larval imaginal discs using the eye-specific GMR-GAL4 driver (S4 Fig). Both T3A  
203 (Fig 5B) and T3D (Fig 5E) mutants formed fewer inclusions than non-mutated  
204 97QHTTex1 (Fig 5A), while S13D (Fig 5F) and S16D (Fig 5G) mutants showed a  
205 significantly larger number of aggregates (quantification in Fig 5O). S13A (Fig 5C)  
206 and S16A (Fig 5D) showed no difference in the number of inclusions in comparison  
207 with non-mutated 97QHTTex1 (Fig 5O). In the larval eye imaginal discs, all  
208 phosphomutants showed decreased aggregation, with the exception of S13D mutant  
209 that formed more inclusions than the non-mutated 97QHTTex1 (S4 Fig).

210 These findings indicate that expression of N17 phosphomutants can modulate  
211 97QHTTex1 aggregation in *Drosophila*, depending on the developmental stage and  
212 cellular context.

213

#### 214 **PP1 regulates HTTex1 aggregation and neurotoxicity in *Drosophila***

215 In order to test if protein phosphatases also regulate HTTex1 aggregation in  
216 *Drosophila*, we performed RNAi knockdown experiments for the homologues of PP1,  
217 PP2A and Cdc25 in flies expressing 97QHTTex1 in dopaminergic neurons (Fig 5,  
218 columns 4-6, and S5 Fig). These three phosphatases caused the stronger decrease in  
219 HTTex1 aggregation in mammalian cells, upon chemical inhibition. PP1 knockdown  
220 flies showed a significant decrease in 97QHTTex1 aggregation (Fig 5H), while PP2A  
221 or string (Cdc25 homologue) downregulation had no effect on 97QHTTex1  
222 aggregation (S5 Fig, A and B). PP1 downregulation prevented 97QHTTex1  
223 aggregation in the presence of serine-phosphoresistant mutants (S13A or S16A) (Fig  
224 5J and K), but not T3A, where we did not observe any statistically significant change  
225 in the number of aggregates when compared with T3A in the absence of PP1 RNAi  
226 (Fig 5O). These results indicate that the effect of PP1 RNAi on 97QHTTex1

227 aggregation might be mostly mediated by T3 phosphorylation. On the other hand, PP1  
228 knockdown caused an increased number of aggregates in T3D background, and a  
229 reduction in the number of aggregates in S13D and S16D backgrounds (Fig 5O).  
230 Since HTTex1 does not contain any phosphorylatable residue beyond N17 domain,  
231 the increased aggregation observed in the T3D background upon PP1 inhibition  
232 suggests that S13 and/or S16 might also be target for phosphorylation to modulate  
233 97QHTTex1 aggregation, in our *Drosophila* model.

234 We next analysed the effect of PP1, PP2A or string RNAi knockdown on  
235 HTTex1 toxicity in the *Drosophila* eye photoreceptor neurons (Fig 6 and S5 Fig).  
236 Importantly, genetic inhibition of PP1 did not compromise rhabdomere viability in  
237 flies expressing wild-type (19Q) HTTex1 under the control of Rh1-GAL4 (Fig 6A,  
238 column 4 and 6D). However, PP1 knockdown significantly enhanced 97QHTTex1  
239 toxicity, further reducing the number of rhabdomeres in an age dependent manner  
240 (Fig 6A-C, column 5 and 6C). PP2A or string RNAi had no effect in the number of  
241 rhabdomeres upon co-expression with 19QHTTex1 or 97QHTTex1 (S5 Fig, C and  
242 D).

243

## 244 **Discussion**

245 Protein misfolding and aggregation are intimately involved in the pathogenesis  
246 of HD and other neurodegenerative disorders. Despite extensive research in the field,  
247 the precise molecular mechanisms by which misfolded proteins aggregate and form  
248 toxic species remain elusive. Increasing evidence suggests that targeting  
249 phosphorylation events in the N17 domain of mutant HTT can influence the  
250 pathological function of the protein [28,30,36-38]. However, the significance of single

251 N17 phosphorylation events in HTT oligomerization, aggregation and toxicity is still  
252 poorly understood.

253 Here, we report that single N17 phosphorylation can prevent HTTex1  
254 aggregation, but not oligomerization. We propose that each residue has a different  
255 “strength” in modulating HTTex1 aggregation. Importantly, we found that protein  
256 phosphatase 1 can control HTTex1 aggregation and toxicity, suggesting that N17  
257 phosphorylation might be mediated by this protein phosphatase. The fact that single  
258 N17 phosphorylation events are sufficient to abolish HTTex1 aggregation could be  
259 very important from an HD therapeutic perspective, since a single N17  
260 phosphorylation could provide a simpler molecular target than double  
261 phosphorylation.

262 We show that single phosphomimic mutation in T3, S13 or S16 allow  
263 97QHTTex1 to oligomerize but not to form large inclusions in human cells (Fig 1 and  
264 S2 Fig). Double S13/S16 phosphorylation prevents aggregation both *in vitro* and *in*  
265 *vivo*, and toxicity *in vivo* [22,26]. However, double S13/S16 phosphorylation is less  
266 abundant than single phosphorylation events [39], and may require the overexpression  
267 of specific kinases [30], which may confound therapeutic efforts based on this  
268 approach. Although some studies reported on the effect of single S13 or S16  
269 phosphorylation events on HTTex1 intracellular localization, they did not focus on  
270 HTTex1 oligomerization, aggregation or toxicity [28,37]. Results from cell-free  
271 systems indicate that single S13- or S16-phosphorylated HTTex1 behave similarly to  
272 double S13/S16-phosphorylated HTTex1 in terms of aggregation, being unable to  
273 form mature fibrils [26]. Our findings in living human cells provide additional  
274 biological support for those *in vitro* studies.

275           The unique properties of our BiFC cellular model allowed us to analyse the  
276 relative contribution of each phosphorylatable residue towards HTTex1  
277 oligomerization and aggregation. We found that T3D completely abolished  
278 97QHTTex1 aggregation in the presence of any other phosphomutant or non-mutated  
279 97QHTTex1 molecules, while S13D or S16D only had a partial reduction effect (Fig  
280 2 and Table 1). These results, together with the higher abundance of T3-  
281 phosphorylated pools [39,40], highlight the relevance of this residue in modulating  
282 the aggregation of HTTex1, and strongly support T3 as a promising target for HD  
283 intervention [29]. Our results also suggest that, HTTex1 might be predominantly  
284 unphosphorylated under pathological conditions [29,37], as phosphoresistant  
285 combinations behave more similarly to the non-mutated 97QHTTex1 pair than to the  
286 phosphomimics, regarding their aggregation pattern (Fig 1 and Table 1).

287           Previous *in vitro* studies demonstrate that N17 phosphorylation inhibits  $\beta$ -  
288 sheet conformation of mutant HTTex1 and suppresses its fibrillisation, stabilizing the  
289  $\alpha$ -helical structure of the N17 domain which could led to altered aggregation  
290 dynamics [41,53]. In FRAP experiments, we show that combinations of  
291 phosphomimic and non-mutated 97QHTTex1 induced the formation of inclusions that  
292 were more dynamic, diffuse and fluid than regular 97QHTTex1 aggregates,  
293 resembling an intermediate stage between oligomers and mature inclusions (Fig 3, S1-  
294 S4 and S6 Videos). Additionally, non-mutated 97QHTTex1 pairs did not aggregate to  
295 the same extent as the phosphoresistant combinations (Fig 1C and Table 1). Thus, we  
296 propose a model where unphosphorylated HTTex1 fragments oligomerize and form  
297 inclusions that grow into mature fibrils until enough phosphorylated HTTex1  
298 molecules are intercalated in the structure to interfere with the process, acting as a

299 'brake'. This could explain the existence of aggregates of various sizes and  
300 morphologies.

301 Genetic and pharmacological inhibition of PP1 resulted in lower 97QHTTex1  
302 aggregation and increased toxicity (Fig 4-6). Protein phosphatases PP2B/3  
303 (Calcineurin), PP2C and PP1/PP2A have been also shown to regulate HTT  
304 phosphorylation at several residues beyond exon 1, as well as HTT toxicity [42-46]. It  
305 is important to note that HTTex1 does not contain any phosphorylatable residue  
306 beyond the N17 domain and, therefore, any direct effect of protein phosphatases  
307 should happen on T3, S13 or S16. Our results indicate that PP1 affects 97QHTTex1  
308 aggregation by regulating T3 phosphorylation. In *Drosophila* dopaminergic neurons,  
309 PP1 knockdown in serine-phosphomutant backgrounds leads to a decrease in  
310 97QHTTex1 aggregation, regardless the phosphorylation-like state of these residues  
311 (Fig 5O). Moreover, PP1 RNAi does not cause any further reduction of 97QHTTex1  
312 aggregation when co-expressed with T3A mutant. Together, these data suggest that  
313 the effect of PP1 inhibition on HTTex1 aggregation is primarily mediated by T3  
314 phosphorylation. However, an increase in 97QHTTex1 aggregation is observed when  
315 PP1 RNAi is co-expressed with T3D mutant (Fig 5L and O), indicating that S13 and  
316 S16 might also be target for PP1 regulation. Since S13D or S16D increase  
317 97QHTTex1 aggregation (Fig 5F, G and O), we hypothesize that PP1 modulates S13  
318 or S16 phosphorylation upon T3 phosphorylation. In fact, it is likely that different  
319 N17 mutations may contribute to subsequent phosphorylation events in other residues.  
320 For example, IKK-mediated S16 phosphorylation is facilitated by previous  
321 phosphorylation of S13 [30].

322 Interestingly, the striking decrease in 97QHTTex1 aggregation observed when  
323 PP1 RNAi was co-expressed with S13D or S16D mutants versus S13D or S16D alone

324 (no RNAi) (Fig 5O), suggests that T3 phosphorylation is dominant over S13 or S16  
325 phosphorylation. Our human cell data also supports this hypothesis, since S13D or  
326 S16D BiFC combinations with non-mutated 97QHTTex1 still shows aggregates,  
327 while T3D BiFC combinations with any other mutant completely abolishes  
328 aggregation (Fig 2 and Table 1).

329 In summary, our results support a strong role for single N17 phosphorylation  
330 events on HTTex1 aggregation, dynamics and toxicity, and uncover the regulatory  
331 role of PP1 in these events. Ultimately, our study opens novel avenues for the  
332 therapeutic targeting of PP1 and N17 phosphorylation in HD.

333

## 334 **Materials and methods**

### 335 **Cell culture, plasmids and treatments**

336 Human H4 glioma cells (ATCC HTB-148, LGC Standards, Barcelona, Spain) were  
337 maintained in OPTI-MEM I culture medium (Gibco, Invitrogen, Barcelona, Spain)  
338 supplemented with 10% (v/v) fetal bovine serum (FBS) and 1% (w/v) of a  
339 penicillin/streptomycin commercial antibiotic mixture (Gibco, Invitrogen, Barcelona,  
340 Spain), under controlled conditions of temperature and humidity (37°C, 5% CO<sub>2</sub>).  
341 Different types of cell culture dishes were used for cell seeding depending on the  
342 application. For flow cytometry and toxicity assays, cells were grown on 6-well plates  
343 (35 mm diameter, Techno Plastic Cultures AG, Switzerland). For microscopy, cells  
344 were seeded on glass-bottom 35 mm dishes (10 mm glass surface diameter, MatTek  
345 Corporation, Ashland, MA, USA). And, for protein extraction (PAGE and filter trap  
346 assays), cells were seeded on 100 mm dishes (Techno Plastic Cultures AG,  
347 Switzerland). For all experiments, cells were counted and seeded at a density of  
348 10,000 cells/cm<sup>2</sup> regardless dish size. Generation of HTTex1- and tau-Venus BiFC

349 constructs was described in detail elsewhere [47,49]. Alpha-synuclein-Venus BiFC  
350 plasmids were a kind gift from Pamela J. McLean (Department of Neurology,  
351 Alzheimer's Disease Research Unit, Massachusetts General Hospital, MA, USA).  
352 Phosphomimic (T3, S13 or S16 mutated to aspartic acid) and phosphoresistant (T3,  
353 S13 or S16 mutated to alanine) constructs were produced by PCR-based site-directed  
354 mutagenesis using 97QHTTex1-Venus plasmids as templates. Plasmid transfection  
355 was performed by means of the X-tremeGene 9 reagent (Roche diagnostics,  
356 Mannheim, Germany), following manufacturer's instructions. Twenty-four hours after  
357 transfection, cells were collected and analysed for oligomerization, aggregation and  
358 toxicity as described below. Pharmacological inhibition of protein phosphatases was  
359 performed using a phosphatase inhibitor library (Enzo Life Sciences, Lausen,  
360 Switzerland). Briefly, cells were treated with 33 different phosphatase inhibitors upon  
361 transfection of 97QHTTex1 BiFC constructs. Phosphatase inhibitors were dissolved  
362 in DMSO and added to culture medium at variable concentrations, according to the  
363 IC50 described in manufacturer's instructions (S1 Table).

364

### 365 **Flow cytometry**

366 Cells were washed with Ca<sup>2+</sup> and Mg<sup>2+</sup> free phosphate buffer saline (PBS) (Gibco,  
367 Invitrogen, Barcelona, Spain) and collected by trypsinization (0.05% w/v trypsin, 5  
368 min, 37°C) into BD Falcon Round-Bottom tubes (BD Biosciences, San Jose, CA,  
369 USA). Cell pellet was resuspended in PBS and analysed by means of a LSR Fortessa  
370 flow cytometer (Beckton Dickinson, Franklin Lakes, NJ, USA). Ten thousand cells  
371 were examined per experimental group. The FlowJo software (Tree Star Inc.,  
372 Ashland, OR, USA) was used for data analyses and representation.

373

374 **Fluorescence microscopy and FRAP experiments**

375 Images of living H4 cells were acquired using an Axiovert 200M widefield  
376 fluorescence microscope equipped with a CCD camera (Carl Zeiss MicroImaging  
377 GmbH, Germany). Pictures of a total of 100-150 cells per sample were scored for  
378 aggregate quantification using the ImageJ free software (<http://rsbweb.nih.gov/ij/>).  
379 FRAP experiments were performed using a META LSM 510 confocal microscope.  
380 Briefly, protein aggregates were focused at the central focal plane and adjusted to  
381 avoid pixel saturation. Experiments lasted for 70-150 s, taking one picture every  
382 second. After establishing the basal signal, aggregates were bleached using the 488  
383 nm laser line at 100% laser transmission on a circular region of interest (ROI) with a  
384 diameter of 30 pixels (1.31  $\mu\text{m}$  radius) for 5 s (10 iterations). Fluorescence recovery  
385 was then monitored for 60-140 s with LSM software. Images were analysed and  
386 prepared for publication by means of the ImageJ free software.

387

388 **Immunoblotting**

389 Proteins were extracted in native or denaturing conditions according to the  
390 requirements of each technique. Briefly, cells were washed with PBS 1X and  
391 collected by scraping. Cells were incubated with lysis buffer and sonicated for 10 sec  
392 at 5 mA using a Soniprep 150 sonicator (Albra, Milano, Italy). For denaturalizing  
393 conditions, the lysis buffer was 1% Triton X-100, 150 mM NaCl, 50 mM Tris pH 7.4,  
394 supplemented with a protease inhibitor cocktail (Roche diagnostics, Mannheim,  
395 Germany). For native conditions, the lysis buffer was 173 mM NaCl, 50 mM Tris pH  
396 7.4, 5 mM EDTA, also supplemented with protease inhibitor cocktail. Proteins were  
397 collected after cell lysate centrifugation at 10,000 g for 10 min at 4°C and quantified  
398 by means of the BCA Protein Assay Reagent Kit (Thermo Fisher Scientific Inc.,



399 Rockford, IL, USA), following manufacturer's instructions. For SDS- or Native-  
400 PAGE immunoblotting, 15 µg of total protein extracts were prepared and separated by  
401 electrophoresis using a 12% SDS-polyacrylamide gel or a 5% SDS-free-  
402 polyacrylamide gel, respectively. For denaturing conditions, samples were boiled in  
403 standard loading buffer (200 mM Tris-HCl pH 6.8, 8% SDS, 40% glycerol, 6.3% β-  
404 mercaptoethanol, 0.4% bromophenol blue) for 5 min at 95°C. For native conditions,  
405 extracts were mixed with SDS- and mercaptoethanol free loading buffer (200 mM  
406 Tris-HCl pH 6.8; 40% glycerol; 0.4% bromophenol blue) and the boiling step was  
407 omitted. Proteins were transferred onto PVDF membranes and blocked with 5% (w/v)  
408 non-fat dry milk in Tris-HCl buffer saline-Tween solution (TBS-T) (150 mM NaCl,  
409 50 mM Tris pH 7.4, 0.5% Tween-20) for 1 h at room temperature. Membranes were  
410 incubated with primary antibodies against HTT (1:500, Millipore, Billerica, MA,  
411 USA) and GAPDH (1:30000, Ambion, Austin, TX, USA) as specified. A secondary  
412 mouse IgG Horseradish Peroxidase-linked antibody (1:10000, GE Healthcare Life  
413 Sciences, Uppsala, Sweden) was used for 1 h incubation at room temperature.  
414 Immunoblots were developed with enhanced chemiluminescence reagents (Millipore,  
415 Billerica, MA, USA) and exposed to X-ray films.

416

#### 417 **Filter trap assays**

418 Cells were pelleted by centrifugation at 700 g for 10 min and cell lysates collected in  
419 native conditions as described above. One hundred µg of native protein extracts were  
420 mixed with SDS to a final concentration of 0.4% (w/v). Samples were loaded on a  
421 dot-blotting device and filtered by vacuum through cellulose acetate membranes (0.22  
422 µm pore; GE Water & Process Technologies, Fairfield, CT, USA), previously  
423 incubated with 1% (w/v) SDS solution in PBS. After filtration, membranes were

424 washed twice and processed for immunoblotting detection of HTT, as described above.  
425 In these conditions, only large SDS-insoluble aggregates are retained in the filter and  
426 therefore HTT signal is proportional to the presence of large insoluble species.  
427 Analyses and quantification of blots signal were performed using ImageJ software.  
428 HTTex1 aggregation levels (Fig 4) were calculated by densitometry analyses and  
429 normalized to total HTT expression levels and GAPDH loading control.

430

### 431 ***Drosophila* stocks, genetics and crosses**

432 Flies were maintained at 25°C and raised on standard cornmeal medium in a light/dark  
433 cycle of 12 h. We generated eight constructs encoding for different versions of  
434 HTTex1 fused to mCherry: a wild-type version with a polyQ tail containing 19  
435 glutamines, a mutant version with 97 glutamines, and six constructs encoding  
436 phosphomutant versions (T3A/D, S13A/D and S16A/D) with 97 glutamines. To  
437 establish transgenic UAS-HTTex1-mCherry lines, our constructs were cloned into  
438 pWalium10-roe by the Gateway cloning technology (Thermo Fisher Scientific, USA),  
439 and then injected into  $y^1w^{1118}$  embryos using phiC31 integrase-mediated DNA  
440 recombination (BestGene strain #9723, attP landing site at 2L-28E7). For genetic  
441 knockdown experiments in *Drosophila*, we employed UAS-RNAi-targeted lines of  
442 four phosphatases: *string* (homolog of cdc25 phosphatase, BL34831, HMS00146),  
443 *PP1 $\alpha$ -96A* (alpha-1 isoform of PP1 catalytic subunit, BL42641, HMS02477), *PP1 $\alpha$ -*  
444 *87B* (alpha-2 isoform of PP1 catalytic subunit, BL32414, HMS00409), and *PP2A-29B*  
445 (PP2A regulatory subunit, BL43283, HMS01921). RNAi stocks were obtained from  
446 the TRiP (Transgenic RNAi Project) library [54,55], courtesy of the Bloomington  
447 *Drosophila* Stock Center (Indiana University, Bloomington, IN, USA). Three  
448 different driver lines were used: TH-GAL4 (active in dopaminergic neurons, under

449 the control of the tyrosine hydroxylase promotor), GMR-GAL4 (active in the eye) and  
450 Rh1-GAL4 (active in the photoreceptors R1-R6, under the control of rhodopsin1  
451 promotor). To analyze the effect of RNAi downregulation of specific phosphatases  
452 upon HTTex1 aggregation and toxicity, UAS-  
453 97QHTTmCherry/CyO;THGAL4/TM6B was crossed with UAS-RNAi-targeted lines.  
454 Adult flies carrying UAS-97QHTTmCherry/+;TH-GAL4/UAS-*string*RNAi, UAS-  
455 97QHTTmCherry/+;TH-GAL4/UAS-*PPI* $\alpha$ -87BRNAi, UAS-97QHTTmCherry/UAS-  
456 *PPI* $\alpha$ -96A;TH-GAL4/+ and UAS-97QHTTmCherry/+;TH-GAL4/UAS-*PP2A*-  
457 29BRNAi were selected and analysed. Unless specified otherwise, flies carrying  
458 UAS-lacZ targeted to the same location were used as controls. For deep pseudopupil  
459 (DPP) analysis, Rh1-GAL4;UAS-GFP<sup>ninaC</sup>/UAS-19QHTTmCherry;UAS-*PPI*-  
460 87BRNAi/+ and Rh1-GAL4;UAS-GFP<sup>ninaC</sup>/UAS-97QHTTmCherry;UAS-*PPI*-  
461 87BRNAi/+ adult flies were selected and analysed. Rh1-GAL4;UAS-GFP<sup>ninaC</sup>, Rh1-  
462 GAL4;UAS-GFP<sup>ninaC</sup>/UAS-19QHTTmCherry;UAS-GFP and Rh1-GAL4;UAS-  
463 GFP<sup>ninaC</sup>/UAS-97QHTTmCherry;UAS-GFP were used as controls.

464

#### 465 **Immunohistochemistry and confocal microscopy**

466 For confocal imaging of adult brains, 10-days-old flies were dissected and brains  
467 prepared as previously described [51]. Briefly, adult flies were anesthetized with CO<sub>2</sub>  
468 and brains isolated in PBS 1X from the head cuticles before being fixed in 4%  
469 paraformaldehyde-containing PBS. Dopaminergic neurons were stained by incubation  
470 for 48 h at 4°C with mouse anti-TH antibody (1:100, Immunostar, Hudson, WI, USA)  
471 in PBST (1X PBS, 0.3% Triton X-100) containing 5% (v/v) normal goat serum.  
472 Samples were washed three times for 15 min in PBST. Mouse anti-Cy5 (1:200,  
473 Jackson ImmunoResearch, West Grove, PA, USA) was diluted in PBST-containing

474 5% (v/v) normal goat serum and used as secondary antibody by incubation for 24 h at  
475 4°C. For larva immunohistochemistry, eye imaginal discs of 3<sup>rd</sup> instar larvae were  
476 dissected in PBS 1X and fixed for 1 h in 4% paraformaldehyde as described [56].  
477 Samples were then washed three times for 15 min in PBST and incubated overnight at  
478 4°C with rat anti-Elav antibody (1:100, Developmental Studies Hybridoma Bank,  
479 University of Iowa, USA). Imaginal discs were washed three times for 15 min in  
480 PBST and incubated for 2 h with rat anti-Cy5 secondary antibody (1:200, Jackson  
481 ImmunoResearch, West Grove, PA, USA). Finally, all samples were submitted to a  
482 last step of washing and mounted in 80% glycerol PBS solution, followed by confocal  
483 microscopy analyses. Z-stack images were acquired using a LSM 710 Meta Zeiss  
484 confocal microscope (resolution of 1024 × 1024, slice thickness of 1 μm, frame  
485 average of 2). Z-projections were generated and merged using ImageJ free software  
486 and images were prepared on Adobe Photoshop CS6 (Adobe Systems Incorporated,  
487 San Jose, CA, USA). For quantification of aggregates, mCherry Z-stack images were  
488 analysed by means of the Fiji software [57] and aggregation was measured using 3D  
489 Objects Counter plugin [58]. The minimum threshold value was defined as 0.144 μm<sup>3</sup>  
490 to exclude signal from soluble HTT in the count. Volume (μm<sup>3</sup>) occupied per each  
491 aggregate, average number of aggregates and standard error were calculated for at  
492 least 5 imaginal discs or adult brains per genotype.

493

#### 494 **Live imaging of adult *Drosophila* eye**

495 DPP analysis was performed in living animals as previously described [51,59].  
496 Briefly, flies at age of 1, 8 or 15 days were anaesthetized with CO<sub>2</sub> and then placed on  
497 a 50 mm petri dish, previously poured with 2% (w/v) agarose at 40°C. Once the  
498 agarose was solidified, the anesthetized flies were covered with cool water to keep

499 anesthetic conditions. Adult compound eye integrity of at least 5 flies per genotype  
500 was examined by fluorescence microscopy with a water immersion objective (HC  
501 APO L40X/0.80W U-V-I, Leica Microsystems, Wetzlar, Germany). Images were  
502 obtained using a Leica DM5500 B microscope (Leica Microsystems, Wetzlar,  
503 Germany) and an Andor Luca R DL-604M camera (Andor Technology Ltd., Belfast,  
504 UK). Images were analysed using Image J free software and number of fluorescing  
505 rhabdomeres was scored for >15 ommatidia per fly.

506

### 507 **Statistical analyses**

508 GraphPad Prism 5 (GraphPad Software Inc., La Jolla, CA, USA) or Sigmaplot  
509 software (Systat Software, Inc., San Jose, CA, USA) were used to perform the  
510 statistical analysis and graphical representation of data. *In vitro* results are shown as  
511 the average  $\pm$  standard deviation (SD) of at least 3 independent experiments and  
512 *Drosophila* results as the average  $\pm$  standard error (SEM), unless specified otherwise.  
513 Cell culture data was analysed by means of a one-way ANOVA followed by a post-  
514 hoc Tukey test for average comparison. Aggregates quantification in *Drosophila* was  
515 analysed by means of a one-way ANOVA with Newman-Keuls post-hoc test. DPP  
516 assays were analysed by means of a two-way ANOVA followed by a Bonferroni post-  
517 hoc test. Results were in all cases considered significant only when  $p < 0.05$ .

518

### 519 **Acknowledgements**

520 The authors thank the Bloomington *Drosophila* Stock Center and the  
521 Developmental Studies Hybridoma Bank for fly stocks and antibodies, respectively.  
522 The authors also thank Bioimaging Unit from Instituto de Medicina Molecular and  
523 Advance Imaging Unit from Gulbenkian Science Institute for support with imaging.

524 TFO and FH were supported by a seed grant from the European Huntington Disease  
525 Network (EHDN). TFO is currently supported by the DFG Center for Nanoscale  
526 Microscopy and Molecular Physiology of the Brain. FH and PMD were also  
527 supported by Project LISBOA-01-0145-FEDER-007660 (Cellular Structural and  
528 Molecular Microbiology) funded by FEDER funds through COMPETE2020 -  
529 Programa Operacional Competitividade e Internacionalização (POCI) and by national  
530 funds through Fundação para a Ciência e Tecnologia (Refs. SFRH/BPD/63530/2009,  
531 IF/00094/2013/CP1173/CT0005 and UID/CBQ/04612/2013). JBS was supported by  
532 Fundação para a Ciência e a Tecnologia (Ref. SFRH/BD/85275/2012). PMD, GMP  
533 and YPA were also supported by Fundação para a Ciência e a Tecnologia (FCT-  
534 ANR/NEU-NMC/0006/2013 and PTDC/NEU-NMC/2459/2014). FG thanks the  
535 Medical Research Council (MRC) for funding that provided valuable infrastructure  
536 supporting this work.

537

### 538 **Author contributions**

539 JBS and FH carried out the experiments in mammalian cells. JBS, GMP and  
540 YPA performed the *Drosophila* experiments, under supervision of PMD and FG. FH,  
541 JBS, PMD and TFO wrote the manuscript, which was edited by all authors. JBS and  
542 FH prepared the figures. FH and TFO had the original idea, supervised the work in  
543 mammalian cells and coordinated the different teams.

544

### 545 **Conflict of interest**

546 The authors declare that they have no conflict of interest.

547

### 548 **References**

- 549 1.     Rochet JC (2007) Novel therapeutic strategies for the treatment of protein-  
550 misfolding diseases. *Expert Rev Mol Med* **9**: 1-34
- 551 2.     Bates GP, Dorsey R, Gusella JF, Hayden MR, Kay C, Leavitt BR, Nance M,  
552 Ross CA, Scahill RI, Wetzel R, *et al* (2015) Huntington disease. *Nat Rev Dis Primers*  
553 **1**: 15005
- 554 3.     Bates GP, Mangiarini L, Davies SW (1998) Transgenic mice in the study of  
555 polyglutamine repeat expansion diseases. *Brain Pathol* **8**: 699-714
- 556 4.     Mangiarini L, Sathasivam K, Seller M, Cozens B, Harper A, Hetherington C,  
557 Lawton M, Trottier Y, Lehrach H, Davies SW, *et al* (1996) Exon 1 of the HD gene  
558 with an expanded CAG repeat is sufficient to cause a progressive neurological  
559 phenotype in transgenic mice. *Cell* **87**: 493-506
- 560 5.     The Huntington's Disease Collaborative Research Group (1993) A novel gene  
561 containing a trinucleotide repeat that is expanded and unstable on Huntington's  
562 disease chromosomes. *Cell* **72**: 971-983.
- 563 6.     Ambrose CM DM, Barnes G, Bates GP, Lin CS, Srinidhi J, Baxendale S,,  
564 Hummerich H LH, Altherr M, (1994) Structure and expression of the Huntington's  
565 disease gene: evidence against simple inactivation due to an expanded CAG repeat.  
566 *Somat Cell Mol Genet* **20**: 27-38
- 567 7.     Krobitsch S, Lindquist S (2000) Aggregation of huntingtin in yeast varies with  
568 the length of the polyglutamine expansion and the expression of chaperone proteins.  
569 *Proc Natl Acad Sci U S A* **97**: 1589-1594
- 570 8.     DiFiglia M, Sapp E, Chase KO, Davies SW, Bates GP, Vonsattel JP, Aronin N  
571 (1997) Aggregation of huntingtin in neuronal intranuclear inclusions and dystrophic  
572 neurites in brain. *Science* **277**: 1990-1993

- 573 9. Kuiper EFE, de Mattos EP, Jardim LB, Kampinga HH, Bergink S (2017)  
574 Chaperones in Polyglutamine Aggregation: Beyond the Q-Stretch. *Frontiers in*  
575 *Neuroscience* **11**
- 576 10. Burke KA, Kauffman KJ, Umbaugh CS, Frey SL, Legleiter J (2013) The  
577 interaction of polyglutamine peptides with lipid membranes is regulated by flanking  
578 sequences associated with huntingtin. *J Biol Chem* **288**: 14993-15005
- 579 11. Michalek M, Salnikov ES, Werten S, Bechinger B (2013) Membrane  
580 interactions of the amphipathic amino terminus of huntingtin. *Biochemistry* **52**: 847-  
581 858
- 582 12. Atwal RS, Xia J, Pinchev D, Taylor J, Epanand RM, Truant R (2007) Huntingtin  
583 has a membrane association signal that can modulate huntingtin aggregation, nuclear  
584 entry and toxicity. *Hum Mol Genet* **16**: 2600-2615
- 585 13. Rockabrand E, Slepko N, Pantalone A, Nukala VN, Kazantsev A, Marsh JL,  
586 Sullivan PG, Steffan JS, Sensi SL, Thompson LM (2007) The first 17 amino acids of  
587 Huntingtin modulate its sub-cellular localization, aggregation and effects on calcium  
588 homeostasis. *Hum Mol Genet* **16**: 61-77
- 589 14. Cornett J, Cao F, Wang CE, Ross CA, Bates GP, Li SH, Li XJ (2005)  
590 Polyglutamine expansion of huntingtin impairs its nuclear export. *Nat Genet* **37**: 198-  
591 204
- 592 15. Xia J, Lee DH, Taylor J, Vandelft M, Truant R (2003) Huntingtin contains a  
593 highly conserved nuclear export signal. *Hum Mol Genet* **12**: 1393-1403
- 594 16. Crick SL, Ruff KM, Garai K, Frieden C, Pappu RV (2013) Unmasking the  
595 roles of N- and C-terminal flanking sequences from exon 1 of huntingtin as  
596 modulators of polyglutamine aggregation. *Proc Natl Acad Sci U S A* **110**: 20075-  
597 20080



- 598 17. Jayaraman M, Kodali R, Sahoo B, Thakur AK, Mayasundari A, Mishra R,  
599 Peterson CB, Wetzel R (2012) Slow amyloid nucleation via alpha-helix-rich  
600 oligomeric intermediates in short polyglutamine-containing huntingtin fragments. *J*  
601 *Mol Biol* **415**: 881-899
- 602 18. Williamson TE, Vitalis A, Crick SL, Pappu RV (2010) Modulation of  
603 polyglutamine conformations and dimer formation by the N-terminus of huntingtin. *J*  
604 *Mol Biol* **396**: 1295-1309
- 605 19. Thakur AK, Jayaraman M, Mishra R, Thakur M, Chellgren VM, Byeon IJ,  
606 Anjum DH, Kodali R, Creamer TP, Conway JF, *et al* (2009) Polyglutamine disruption  
607 of the huntingtin exon 1 N terminus triggers a complex aggregation mechanism. *Nat*  
608 *Struct Mol Biol* **16**: 380-389
- 609 20. Wetzel R (2006) Nucleation of huntingtin aggregation in cells. *Nat Chem Biol*  
610 **2**: 297-298
- 611 21. Veldman MB, Rios-Galdamez Y, Lu XH, Gu X, Qin W, Li S, Yang XW, Lin  
612 S (2015) The N17 domain mitigates nuclear toxicity in a novel zebrafish Huntington's  
613 disease model. *Mol Neurodegener* **10**: 67
- 614 22. Gu X, Cattle JP, Greiner ER, Lee CY, Barth AM, Gao F, Park CS, Zhang Z,  
615 Sandoval-Miller S, Zhang RL, *et al* (2015) N17 Modifies mutant Huntingtin nuclear  
616 pathogenesis and severity of disease in HD BAC transgenic mice. *Neuron* **85**: 726-  
617 741
- 618 23. Choudhury KR, Bhattacharyya NP (2015) Chaperone protein HYPK interacts  
619 with the first 17 amino acid region of Huntingtin and modulates mutant HTT-  
620 mediated aggregation and cytotoxicity. *Biochem Biophys Res Commun* **456**: 66-73

- 621 24. Maiuri T, Woloshansky T, Xia J, Truant R (2013) The huntingtin N17 domain  
622 is a multifunctional CRM1 and Ran-dependent nuclear and cilial export signal. *Hum*  
623 *Mol Genet* **22**: 1383-1394
- 624 25. Zheng Z, Li A, Holmes BB, Marasa JC, Diamond MI (2013) An N-terminal  
625 nuclear export signal regulates trafficking and aggregation of Huntingtin (Htt) protein  
626 exon 1. *J Biol Chem* **288**: 6063-6071
- 627 26. Mishra R, Hoop CL, Kodali R, Sahoo B, van der Wel PC, Wetzel R (2012)  
628 Serine phosphorylation suppresses huntingtin amyloid accumulation by altering  
629 protein aggregation properties. *J Mol Biol* **424**: 1-14
- 630 27. Zucchelli S, Marcuzzi F, Codrich M, Agostoni E, Vilotti S, Biagioli M, Pinto  
631 M, Carnemolla A, Santoro C, Gustincich S, *et al* (2011) Tumor necrosis factor  
632 receptor-associated factor 6 (TRAF6) associates with huntingtin protein and promotes  
633 its atypical ubiquitination to enhance aggregate formation. *J Biol Chem* **286**: 25108-  
634 25117
- 635 28. Havel LS, Wang CE, Wade B, Huang B, Li S, Li XJ (2011) Preferential  
636 accumulation of N-terminal mutant huntingtin in the nuclei of striatal neurons is  
637 regulated by phosphorylation. *Hum Mol Genet* **20**: 1424-1437
- 638 29. Aiken CT, Steffan JS, Guerrero CM, Khashwji H, Lukacsovich T, Simmons  
639 D, Purcell JM, Menhaji K, Zhu YZ, Green K, *et al* (2009) Phosphorylation of  
640 threonine 3: implications for Huntingtin aggregation and neurotoxicity. *J Biol Chem*  
641 **284**: 29427-29436
- 642 30. Thompson LM, Aiken CT, Kaltenbach LS, Agrawal N, Illes K, Khoshnan A,  
643 Martinez-Vincente M, Arrasate M, O'Rourke JG, Khashwji H, *et al* (2009) IKK  
644 phosphorylates Huntingtin and targets it for degradation by the proteasome and  
645 lysosome. *J Cell Biol* **187**: 1083-1099

- 646 31. Gu X, Greiner ER, Mishra R, Kodali R, Osmand A, Finkbeiner S, Steffan JS,  
647 Thompson LM, Wetzel R, Yang XW (2009) Serines 13 and 16 are critical  
648 determinants of full-length human mutant huntingtin induced disease pathogenesis in  
649 HD mice. *Neuron* **64**: 828-840
- 650 32. Jana NR, Dikshit P, Goswami A, Kotliarova S, Murata S, Tanaka K, Nukina N  
651 (2005) Co-chaperone CHIP associates with expanded polyglutamine protein and  
652 promotes their degradation by proteasomes. *J Biol Chem* **280**: 11635-11640
- 653 33. Steffan JS, Agrawal N, Pallos J, Rockabrand E, Trotman LC, Slepko N, Illes  
654 K, Lukacsovich T, Zhu YZ, Cattaneo E, *et al* (2004) SUMO modification of  
655 Huntingtin and Huntington's disease pathology. *Science* **304**: 100-104
- 656 34. Steffan JS, Bodai L, Pallos J, Poelman M, McCampbell A, Apostol BL,  
657 Kazantsev A, Schmidt E, Zhu YZ, Greenwald M, *et al* (2001) Histone deacetylase  
658 inhibitors arrest polyglutamine-dependent neurodegeneration in *Drosophila*. *Nature*  
659 **413**: 739-743
- 660 35. Caron NS, Hung CL, Atwal RS, Truant R (2014) Live cell imaging and  
661 biophotonic methods reveal two types of mutant huntingtin inclusions. *Hum Mol*  
662 *Genet* **23**: 2324-2338
- 663 36. Di Pardo A, Maglione V, Alpaugh M, Horkey M, Atwal RS, Sassone J,  
664 Ciammola A, Steffan JS, Fouad K, Truant R, *et al* (2012) Ganglioside GM1 induces  
665 phosphorylation of mutant huntingtin and restores normal motor behavior in  
666 Huntington disease mice. *Proc Natl Acad Sci U S A* **109**: 3528-3533
- 667 37. Atwal RS, Desmond CR, Caron N, Maiuri T, Xia J, Sipione S, Truant R  
668 (2011) Kinase inhibitors modulate huntingtin cell localization and toxicity. *Nat Chem*  
669 *Biol* **7**: 453-460

- 670 38. Khoshnan A, Ko J, Watkin EE, Paige LA, Reinhart PH, Patterson PH (2004)  
671 Activation of the IkappaB kinase complex and nuclear factor-kappaB contributes to  
672 mutant huntingtin neurotoxicity. *J Neurosci* **24**: 7999-8008
- 673 39. Bustamante MB, Ansaloni A, Pedersen JF, Azzollini L, Cariulo C, Wang ZM,  
674 Petricca L, Verani M, Puglisi F, Park H, *et al* (2015) Detection of huntingtin exon 1  
675 phosphorylation by Phos-Tag SDS-PAGE: Predominant phosphorylation on threonine  
676 3 and regulation by IKKbeta. *Biochem Biophys Res Commun* **463**: 1317-1322
- 677 40. Huang B, Lucas T, Kueppers C, Dong X, Krause M, Bepperling A, Buchner J,  
678 Voshol H, Weiss A, Gerrits B, *et al* (2015) Scalable production in human cells and  
679 biochemical characterization of full-length normal and mutant huntingtin. *PLoS One*  
680 **10**: e0121055
- 681 41. Caron NS, Desmond CR, Xia J, Truant R (2013) Polyglutamine domain  
682 flexibility mediates the proximity between flanking sequences in huntingtin. *Proc*  
683 *Natl Acad Sci U S A* **110**: 14610-14615
- 684 42. Marion S, Urs NM, Peterson SM, Sotnikova TD, Beaulieu JM, Gainetdinov  
685 RR, Caron MG (2014) Dopamine D2 receptor relies upon PPM/PP2C protein  
686 phosphatases to dephosphorylate huntingtin protein. *J Biol Chem* **289**: 11715-11724
- 687 43. Rosenstock TR, de Brito OM, Lombardi V, Louros S, Ribeiro M, Almeida S,  
688 Ferreira IL, Oliveira CR, Rego AC (2011) FK506 ameliorates cell death features in  
689 Huntington's disease striatal cell models. *Neurochem Int* **59**: 600-609
- 690 44. Pineda JR, Pardo R, Zala D, Yu H, Humbert S, Saudou F (2009) Genetic and  
691 pharmacological inhibition of calcineurin corrects the BDNF transport defect in  
692 Huntington's disease. *Mol Brain* **2**: 33

- 693 45. Ermak G, Hench KJ, Chang KT, Sachdev S, Davies KJ (2009) Regulator of  
694 calcineurin (RCAN1-1L) is deficient in Huntington disease and protective against  
695 mutant huntingtin toxicity in vitro. *J Biol Chem* **284**: 11845-11853
- 696 46. Pardo R, Colin E, Regulier E, Aebischer P, Deglon N, Humbert S, Saudou F  
697 (2006) Inhibition of calcineurin by FK506 protects against polyglutamine-huntingtin  
698 toxicity through an increase of huntingtin phosphorylation at S421. *J Neurosci* **26**:  
699 1635-1645
- 700 47. Blum D, Herrera F, Francelle L, Mendes T, Basquin M, Obriot H, Demeyer D,  
701 Sergeant N, Gerhardt E, Brouillet E, *et al* (2015) Mutant huntingtin alters Tau  
702 phosphorylation and subcellular distribution. *Hum Mol Genet* **24**: 76-85
- 703 48. Herrera F, Outeiro TF (2012) alpha-Synuclein modifies huntingtin aggregation  
704 in living cells. *FEBS Lett* **586**: 7-12
- 705 49. Herrera F, Tenreiro S, Miller-Fleming L, Outeiro TF (2011) Visualization of  
706 cell-to-cell transmission of mutant huntingtin oligomers. *PLoS Curr* **3**: RRN1210
- 707 50. Sahoo B, Arduini I, Drombosky KW, Kodali R, Sanders LH, Greenamyre JT,  
708 Wetzel R (2016) Folding Landscape of Mutant Huntingtin Exon1: Diffusible  
709 Multimers, Oligomers and Fibrils, and No Detectable Monomer. *PLoS One* **11**:  
710 e0155747
- 711 51. Pocas GM, Branco-Santos J, Herrera F, Outeiro TF, Domingos PM (2015)  
712 alpha-Synuclein modifies mutant huntingtin aggregation and neurotoxicity in  
713 *Drosophila*. *Hum Mol Genet* **24**: 1898-1907
- 714 52. Furlong RA, Narain Y, Rankin J, Wyttenbach A, Rubinsztein DC (2000)  
715 Alpha-synuclein overexpression promotes aggregation of mutant huntingtin. *Biochem*  
716 *J* **346 Pt 3**: 577-581

- 717 53. Chiki A, DeGuire SM, Ruggeri FS, Sanfelice D, Ansaloni A, Wang ZM,  
718 Cendrowska U, Burai R, Vieweg S, Pastore A, *et al* (2017) Mutant Exon1 Huntingtin  
719 Aggregation is Regulated by T3 Phosphorylation-Induced Structural Changes and  
720 Crosstalk between T3 Phosphorylation and Acetylation at K6. *Angew Chem Int Ed*  
721 *Engl*
- 722 54. Perkins LA, Holderbaum L, Tao R, Hu Y, Sopko R, McCall K, Yang-Zhou D,  
723 Flockhart I, Binari R, Shim HS, *et al* (2015) The Transgenic RNAi Project at Harvard  
724 Medical School: Resources and Validation. *Genetics* **201**: 843-852
- 725 55. Ni JQ, Zhou R, Czech B, Liu LP, Holderbaum L, Yang-Zhou D, Shim HS,  
726 Tao R, Handler D, Karpowicz P, *et al* (2011) A genome-scale shRNA resource for  
727 transgenic RNAi in *Drosophila*. *Nat Methods* **8**: 405-407
- 728 56. Purves DC, Brachmann C (2007) Dissection of imaginal discs from 3rd instar  
729 *Drosophila* larvae. *J Vis Exp*: 140
- 730 57. Schindelin J, Arganda-Carreras I, Frise E, Kaynig V, Longair M, Pietzsch T,  
731 Preibisch S, Rueden C, Saalfeld S, Schmid B, *et al* (2012) Fiji: an open-source  
732 platform for biological-image analysis. *Nat Methods* **9**: 676-682
- 733 58. Bolte S, Cordelieres FP (2006) A guided tour into subcellular colocalization  
734 analysis in light microscopy. *J Microsc* **224**: 213-232
- 735 59. Pichaud F, Desplan C (2001) A new visualization approach for identifying  
736 mutations that affect differentiation and organization of the *Drosophila* ommatidia.  
737 *Development* **128**: 815-826

738

### 739 **Figure legends**

740 **Figure 1. Single N17 phosphomimic mutations modulate 97QHTTex1**  
741 **aggregation but not oligomerization in human H4 glioma cells.**

742 (A) HTTex1 (gray bars) was fused to two non-fluorescent halves of the Venus  
743 protein. When HTTex1 dimerizes, Venus recovers fluorescence. The three N17  
744 phosphorylatable residues were mutated to mimic phosphorylation or  
745 dephosphorylation.

746 (B) Cells transfected with phosphoresistant BiFC pairs resemble the non-mutated  
747 97QHTTex1 phenotype in terms of aggregation, while phosphomimic pairs showed a  
748 total absence of aggregates. Scale bar, 20  $\mu$ m.

749 (C) Quantitative analyses of microscopy pictures. Data are represented as average  $\pm$   
750 SD of at least 3 independent experiments. \*, significant versus 97Q/97Q,  $p < 0.05$   
751 (one-way ANOVA).

752 (D) Filter trap assays (FT) were consistent with microscopy results. Phosphomimic  
753 pairs did not produce insoluble aggregates (FT), but showed similar levels of  
754 oligomeric species (Native-PAGE) comparing to non-mutated 97QHTTex1.  
755 Expression levels of each pair were evaluated by SDS-PAGE.

756

757 **Figure 2. Effect of phosphomimic mutants on 97QHTTex1 aggregation is**  
758 **protein-specific.**

759 (A-D) Combinations of 97QHTTex1-Venus 1 BiFC constructs with synuclein- or tau-  
760 Venus 2 BiFC constructs revealed different co-aggregation responses to  
761 phosphomimic constructs. 97QHTTex1 (B) and synuclein (C) showed similar patterns  
762 of aggregation in the presence of single phosphomimic mutations, with T3D being the  
763 most restrictive for decreasing aggregation.

764 (D) Tau co-aggregated with 97QHTTex1 regardless of the N17 mutation.

765 Data information: Data are shown as average  $\pm$  SD of at least 3 independent  
766 experiments. \*, significant versus 97Q/97Q (B) or 97Q/Syn (C),  $p < 0.05$  (one-way  
767 ANOVA). Scale bar, 20  $\mu\text{m}$ .

768

769 **Figure 3. Phosphomimic-containing inclusions of 97QHTTex1 are more**  
770 **dynamic.**

771 (A) Time lapse of FRAP experiments on aggregates containing non-mutated  
772 97QHTTex1 alone or in combination with phosphomimic mutant in H4 glioma cells.  
773 T3D mutants produced no aggregates under any circumstance.

774 (B) Aggregates containing S13D or S16D mutants recovered significantly faster than  
775 the non-mutated 97QHTTex1.

776 (C) Aggregates combining non-mutated 97QHTTex1 with T3A or S13A recovered  
777 more slowly than aggregates made only of non-mutated 97QHTTex1, with the  
778 exception of the S16A/97Q combination.

779 (D) Time lapse of aggregates formed by non-mutated 97QHTTex1 and S13D (S4  
780 Video). Aggregates containing phosphomimic versions are highly dynamic and  
781 flexible, and move (arrow indicates moving aggregate in each frame) through the cell  
782 with more freedom than non-mutated 97QHTTex1 aggregates (S1 Video).

783 Data information: Scale bars, 20  $\mu\text{m}$ .

784

785 **Figure 4. Protein phosphatases regulate HTTex1 aggregation in mammalian**  
786 **cells.**

787 (A) Representative filter trap of protein extracts from cells transfected with non-  
788 mutated 97QHTTex1 BiFC constructs and treated with chemical inhibitors of protein  
789 phosphatases. The graph shows oligomerization levels as determined by flow



790 cytometry (black bars) and aggregation levels as determined by optic density of filter  
791 trap dots (white bars). The names of phosphatase inhibitors (Enzo Life Sciences) and  
792 the concentrations used are described in S1 Table.

793 (B) Selected inhibitors PP1/PP2A (B01 and B02) and Cdc25 (C04 and C05) also  
794 reduced the percentage of H4 cells with large HTTex1 inclusions as determined by  
795 quantitative analyses of microscopy pictures.

796 Data information: Data are all average  $\pm$  SD of at least 3 independent experiments. \*,  
797 significant versus control treated with DMSO,  $p < 0.05$  (one-way ANOVA).

798

799 **Figure 5. PP1 knockdown prevents 97QHTTex1 aggregation in Drosophila.**

800 (A-N) Confocal microscopy images of dopaminergic neurons in adult brains of  
801 transgenic flies expressing different versions of 97QHTTex1-mCherry under the  
802 control of TH-GAL4. 97HTTex1-mCherry is shown in red (column 1 and 4), and  
803 dopaminergic cells (column 2 and 5, anti-TH) are shown in blue. Scale bar, 10  $\mu$ m.

804 (A-G) *Drosophila* brains expressing non-mutated 97QHTTex1-mCherry or the  
805 different phosphomutants. T3A (B) and T3D (E) prevented 97HTTex1-mCherry  
806 aggregation, while phosphomimic mutations at S13 or S16 produced a significant  
807 increase of 97HTTex1-mCherry inclusion bodies (F and G).

808 (H-N) Co-expression of *PP1 $\alpha$ -96A* RNAi together with 97QHTTex1-mCherry or  
809 phosphomutants. *PP1 $\alpha$ -96A* RNAi decreased the number of 97HTTex1-mCherry  
810 inclusions, with the exception of T3A (I), where no change was observed, and T3D  
811 (L) expressing flies, which showed a significant increase in 97HTTex1-mCherry  
812 aggregation, all in comparison to the respective no RNAi expressing genotype.

813 (O) Quantification of average number of aggregates ( $\pm$ SEM) from at least 5  
814 *Drosophila* brains. \*, significant versus TH-GAL4>97QHTTex1. #, significant versus

815 their “no RNAi” transgenic control (white bars). †, significant versus TH-  
816 GAL4>97QHTT/*PPIα-96A* RNAi,  $p < 0.05$  (one-way ANOVA).

817

818 **Figure 6. Downregulation of PP1 potentiates HTTex1 neurotoxicity in adult fly**  
819 **photoreceptor neurons.**

820 (A-C) Representative pictures of photoreceptors observed by water immersion live  
821 imaging of the retinas. Wild-type flies, HD flies and flies expressing *PPIα-87B* RNAi  
822 together with 19QHTTex1 or 97QHTTex1 were analysed at day 1, 8 and 15 post-  
823 eclosion. Wild-type and 19QHTTex1 expressing flies showed normal retinal  
824 morphology as the 6 outer photoreceptors were visible per ommatidium (columns 1  
825 and 2). Flies expressing 97QHTTex1 exhibited age-dependent neurodegeneration  
826 with progressive loss of rhabdomeres from 8 to 15 days after eclosion (B and C,  
827 column 3). *PPIα-87B* downregulation caused an increase of neurotoxicity in flies  
828 expressing 97QHTTex1 (B and C, column 5) and did not affect photoreceptor  
829 integrity of 19QHTTex1 flies (column 4). Visualization of the rhabdomeres was done  
830 using Rh1-Gal4>UAS-GFP<sup>hinaC</sup>, as described in the methods section. Scale bar, 10  
831 μm.

832 (D) Quantification of mean rhabdomeres ( $\pm$ SEM) per ommatidium. At least 30  
833 ommatidia were analysed from eyes of 5-11 different flies. \*, significant versus 97Q.  
834 #, significant versus 97Q at day 1 and day 8,  $p < 0.05$  (two-way ANOVA).

835

836 **Tables**

837 **Table 1. Percentage of cells containing HTT inclusions (average  $\pm$  SEM) when**  
 838 **co-transfected with different combinations of HTTex1-, Syn- or Tau-Venus BiFC**  
 839 **plasmids.**

|         |      | Venus 2 |      |      |                |                |                |                |                |                |
|---------|------|---------|------|------|----------------|----------------|----------------|----------------|----------------|----------------|
|         |      | T3D     | S13D | S16D | T3A            | S13A           | S16A           | 97Q            | Syn            | Tau            |
| Venus 1 | T3D  | 0       | 0    | 0    | 0              | 0              | 0              | 0              | 0              | 15.5 $\pm$ 2.2 |
|         | S13D |         | 0    | 0    | 22.0 $\pm$ 3.4 | 17.1 $\pm$ 2.3 | 14.5 $\pm$ 1.2 | 14.1 $\pm$ 1.3 | 5.6 $\pm$ 1.7  | 15.7 $\pm$ 2.2 |
|         | S16D |         |      | 0    | 27.5 $\pm$ 1.5 | 29.1 $\pm$ 3.6 | 19.8 $\pm$ 3.0 | 22.9 $\pm$ 1.0 | 10.0 $\pm$ 4.8 | 16.5 $\pm$ 1.7 |
|         | T3A  |         |      |      | 46.4 $\pm$ 1.3 | 43.5 $\pm$ 3.6 | 45.9 $\pm$ 2.5 | 34.5 $\pm$ 2.2 | N/D            | N/D            |
|         | S13A |         |      |      |                | 48.5 $\pm$ 1.3 | 35.3 $\pm$ 2.4 | 37.8 $\pm$ 1.9 | N/D            | N/D            |
|         | S16A |         |      |      |                |                | 48.2 $\pm$ 2.6 | 36.6 $\pm$ 6.1 | N/D            | N/D            |
|         | 97Q  |         |      |      |                |                |                | 36.1 $\pm$ 2.2 | 39.3 $\pm$ 3.9 | 16.2 $\pm$ 1.3 |

840 N/D, not determined.

841

## 842 **Supporting information**

843 **S1 Fig. Single N17 phosphoresistant mutations do not alter HTTex1 aggregation**  
 844 **pattern.** Graphic representations from microscopy data of H4 cells transfected with  
 845 the corresponding HTTex1-Venus BiFC pairs. Single phosphoresistant mutations did  
 846 not change significantly the number of aggregates per cell (A), the distribution and  
 847 number of aggregates per cell (B) or the size of aggregates (C).

848

849 **S2 Fig. N17 mutations do not affect HTTex1 oligomerization.** (A) Flow cytometry  
 850 charts of H4 cells transfected with the indicated HTTex1-Venus BiFC pair. Y axis  
 851 represents the side scatter (SSC) signal, and the X axis represents the signal in the  
 852 FITC channel. Both scales are logarithmic. (B and C) Graphic representation of  
 853 quantitative flow cytometry results. \*significant versus 19QHTTex1 pair,  $p < 0.05$ .

854

855 **S3 Fig. Combinations of phosphomimic and non-mutated 97QHTTex1 produce**  
 856 **similar levels of fluorescence.** (A) Representative flow cytometry profiles of cells

857 co-transfected with combinations of phosphomimic mutants and non-mutated  
858 97QHTTex1 BiFC constructs. (B) Quantitative analysis of flow cytometry data.  
859 \*significant versus 19QHTTex1 pair,  $p < 0.05$ .

860

861 **S4 Fig. HTTex1 phosphomutants expression in 3<sup>rd</sup> instar larva eye imaginal**  
862 **discs.** (A-H) Confocal microscopy images of eye imaginal discs in larvae expressing  
863 97QHTTex1-mCherry under the control of GMR-GAL4. 97QHTTex1-mCherry is  
864 shown in red, and photoreceptors (anti-Elav) are shown in blue. Mutations in the N17  
865 phosphorylatable residues reduce 97QHTTex1-mCherry aggregation in larvae (C-E  
866 and G-F), with the exception of S13D (F), which shows increased number of  
867 aggregates versus non-mutated 97QHTTex1 (B). Scale bar, 10  $\mu\text{m}$ .

868

869 **S5 Fig. Knockdown of PP2A or *string* does not affect 97QHTTex1 aggregation or**  
870 **toxicity in *Drosophila*.** (A) Imaging of adult dopaminergic neurons in RNAi  
871 transgenic flies expressing 97QHTTex1 under the control of TH-GAL4. *PP2A-29B* or  
872 *string* RNAi knockdown flies showed no overt phenotype in terms of aggregation  
873 when compared to 97QHTTex1 no RNAi control. (B) Quantitative analyses of  
874 confocal pictures. Data are average number of aggregates  $\pm$  SEM. Scale bar, 10  $\mu\text{m}$ .  
875 *PP2A-29B* (C) or *string* (D) downregulation did not affect progressive photoreceptor  
876 loss observed in 97QHTTex1 flies. \*significant versus 97Q, #significant versus 97Q  
877 at day 1 and day 8,  $p < 0.05$ . ns, no significant versus 97Q at day 15.

878

879 **S6 Fig. Effect of phosphatase inhibitors on HTTex1 expression.** Representative  
880 blots of total protein extracts from H4 cells transfected with non-mutated  
881 97QHTTex1-Venus BiFC constructs and incubated with the indicated phosphatase

882 inhibitors for 24 h. Membranes were probed with anti-HTT and anti-GAPDH  
883 antibodies, as indicated. Corresponds to S1 Table. D, DMSO.

884

885 **S7 Fig. Full images of the western blot figures presented in this article.** A-C, blots  
886 corresponding to Fig 1D. D, blots corresponding to S6 Fig.

887

888 **S1 Video. Fluorescence recovery after photobleaching of an aggregate**  
889 **constituted exclusively by non-mutated 97QHTTex1.** Corresponds to the time-  
890 lapse shown in Fig 3A, first row (97Q/97Q).

891

892 **S2 Video. Fluorescence recovery after photobleaching of an aggregate**  
893 **constituted by combination of non-mutated 97QHTTex1 and S13D.** Corresponds  
894 to the time-lapse shown in Fig 3A, second row (S13D/97Q).

895

896 **S3 Video. Fluorescence recovery after photobleaching of an aggregate**  
897 **constituted by combination of non-mutated 97QHTTex1 and S16D.** Corresponds  
898 to the time-lapse shown in Fig 3A, third row (S16D/97Q).

899

900 **S4 Video. Flexibility of intracellular HTTex1 aggregates constituted by**  
901 **combination of non-mutated 97QHTTex1 and S13D.** Corresponds to the time-  
902 lapse shown in Fig 3D (S13D/97Q).

903

904 **S5 Video. Flexibility of intracellular HTTex1 aggregates constituted by**  
905 **combination of non-mutated 97QHTTex1 and S13A.**

906

907 **S6 Video. Flexibility of intracellular HTTex1 aggregates constituted exclusively**  
908 **by non-mutated 97QHTTex1.**  
909  
910 **S1 Table. Name, concentration, description, toxicity and effect on HTTex1**  
911 **expression of the phosphatase inhibitor library.**

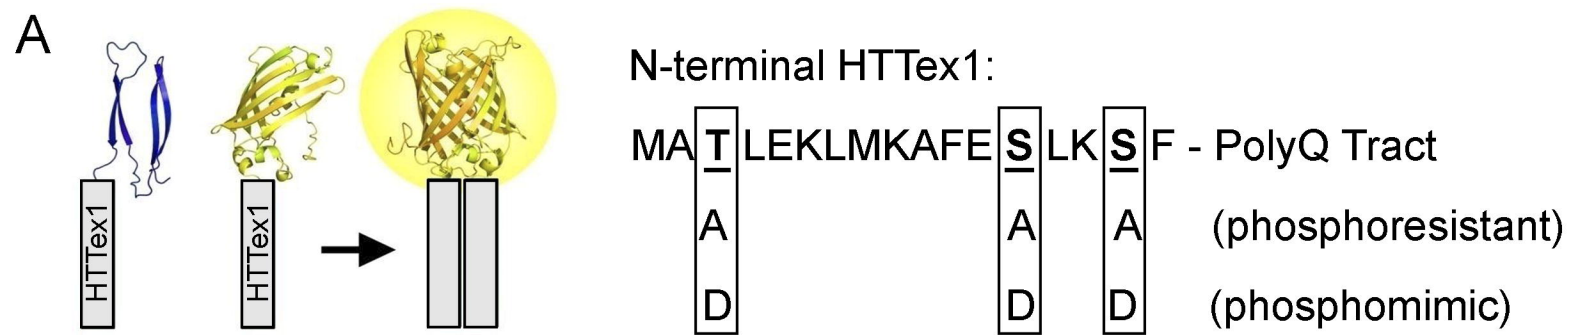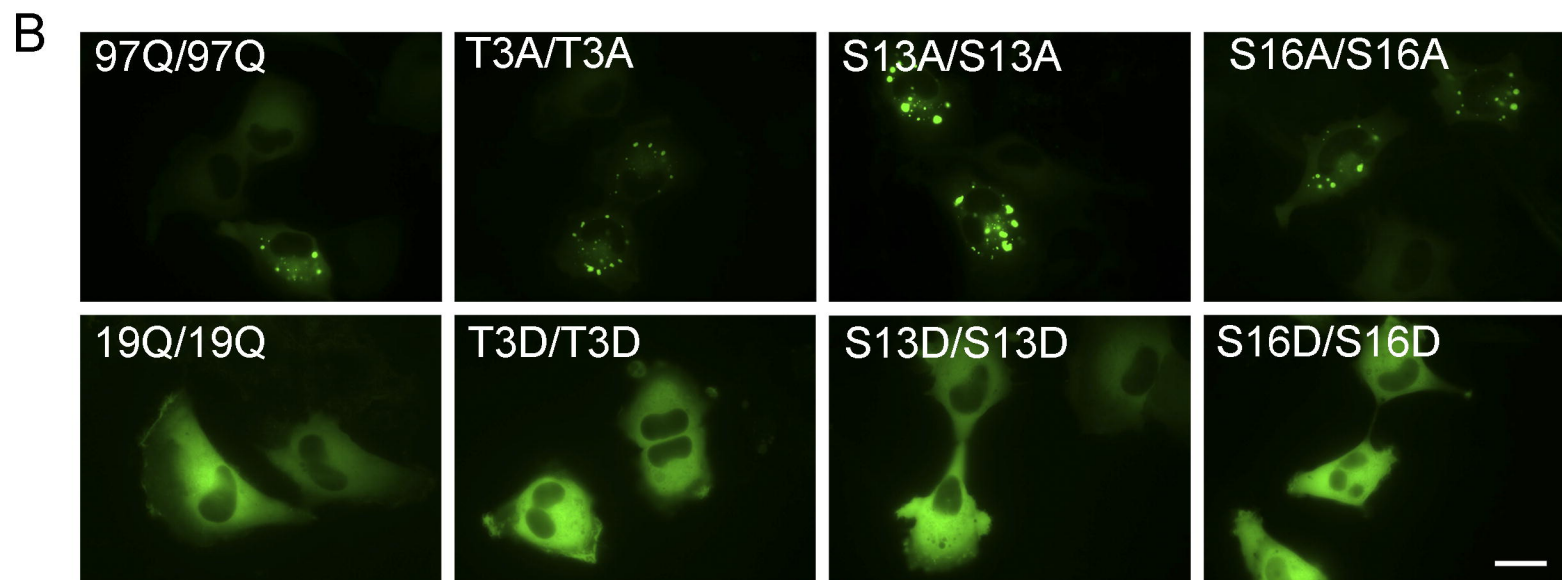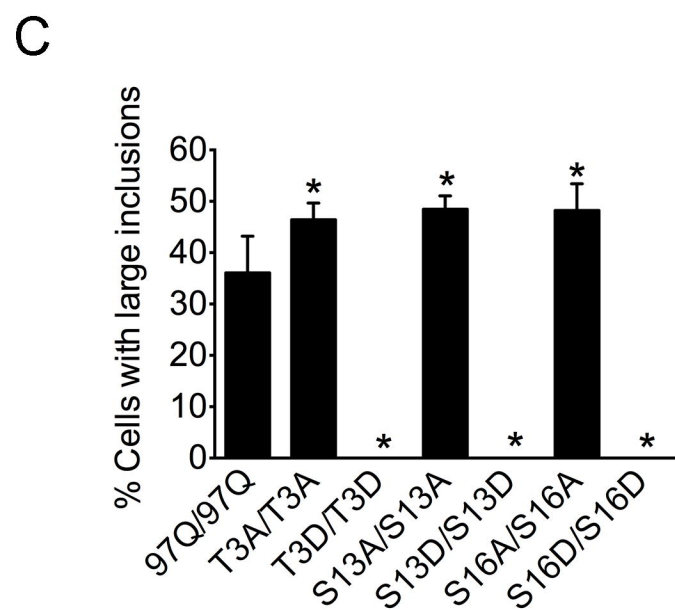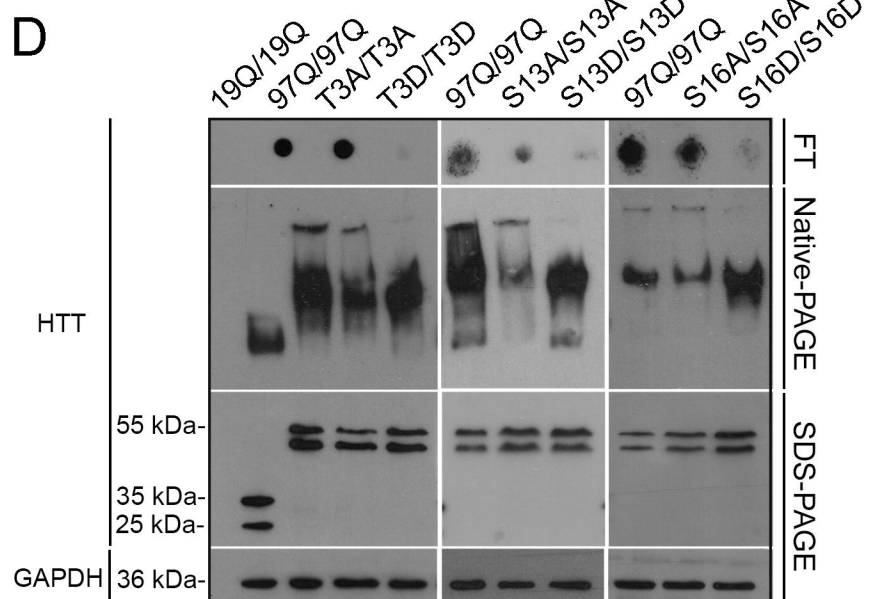



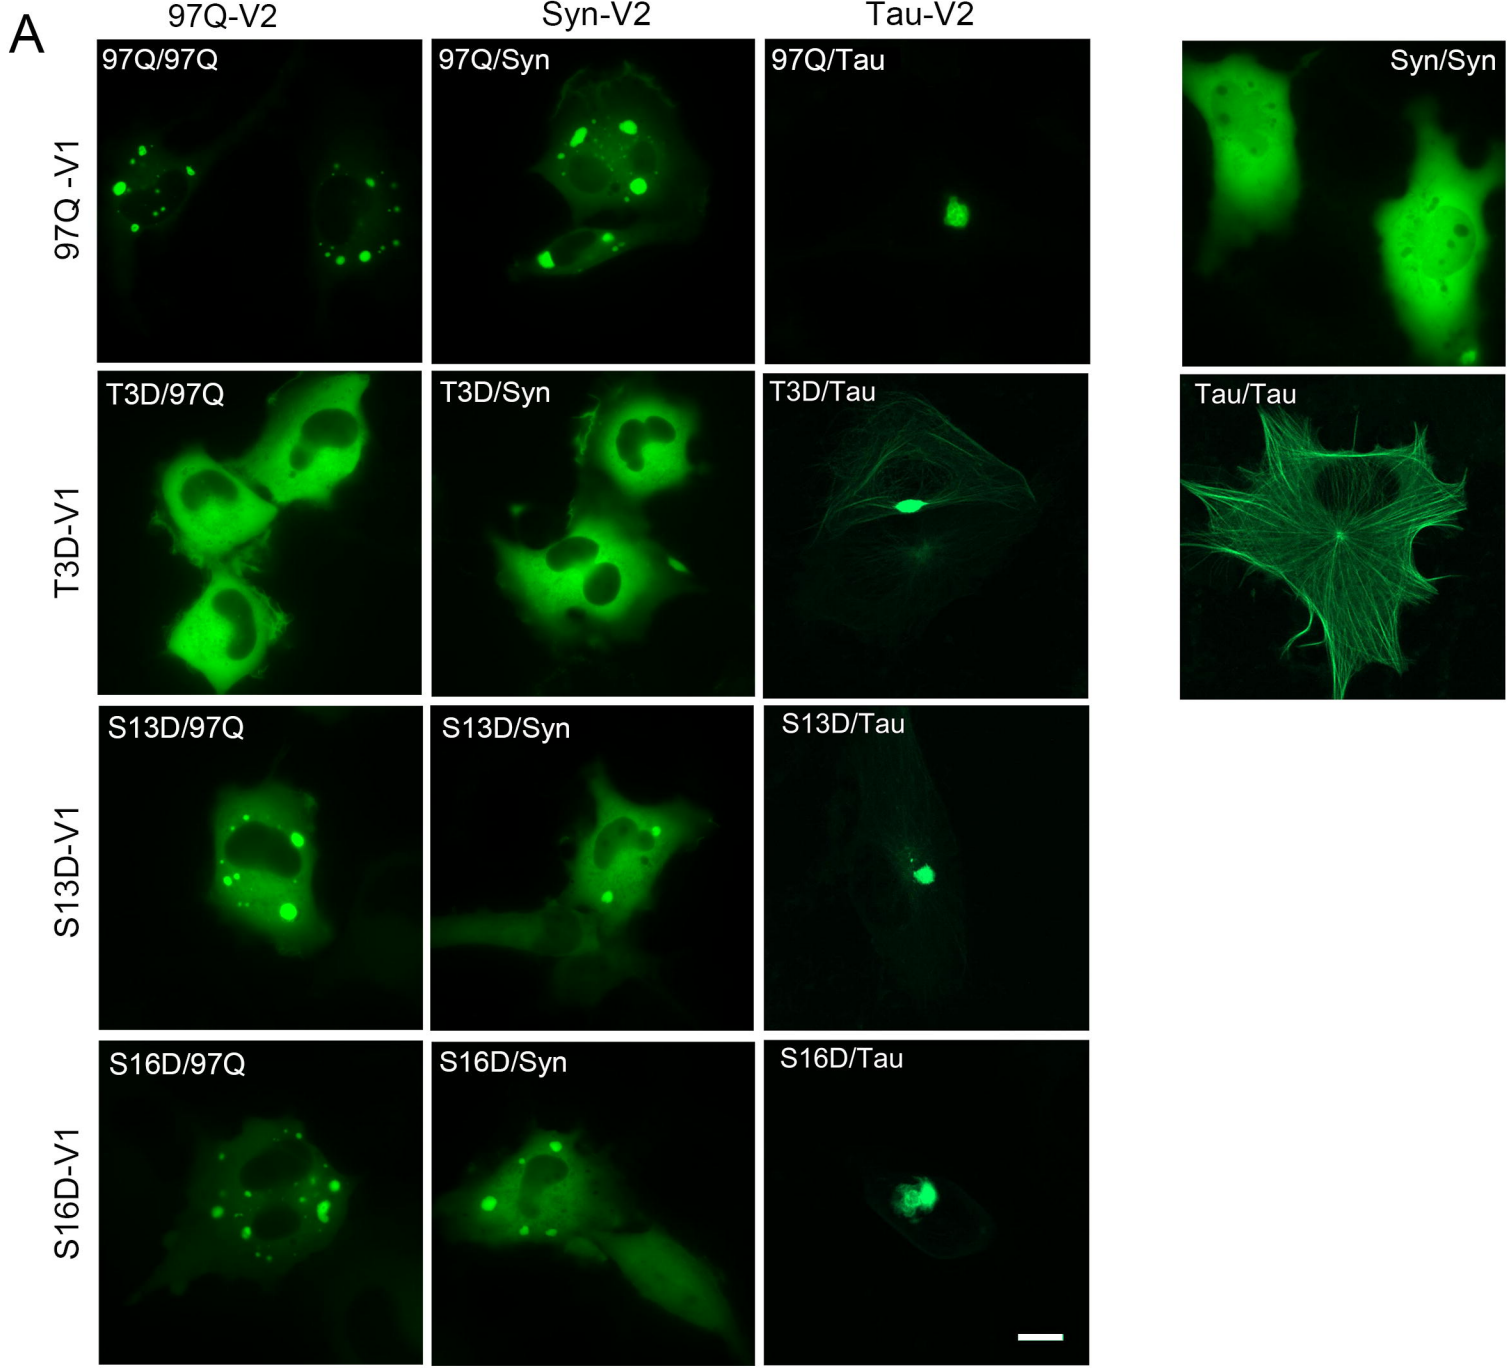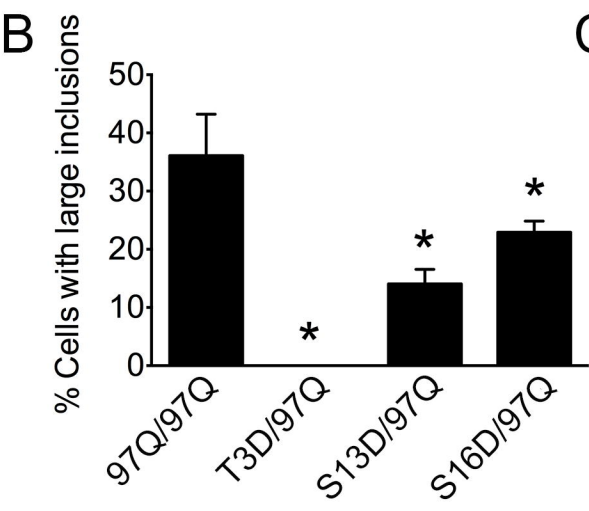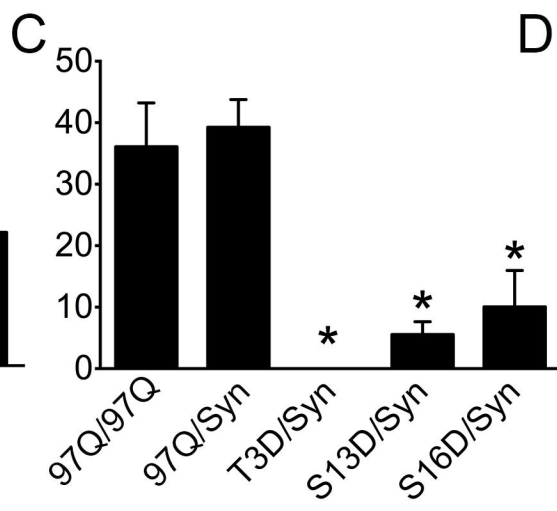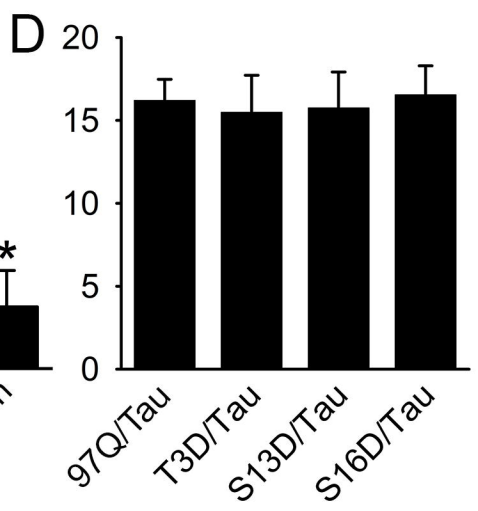



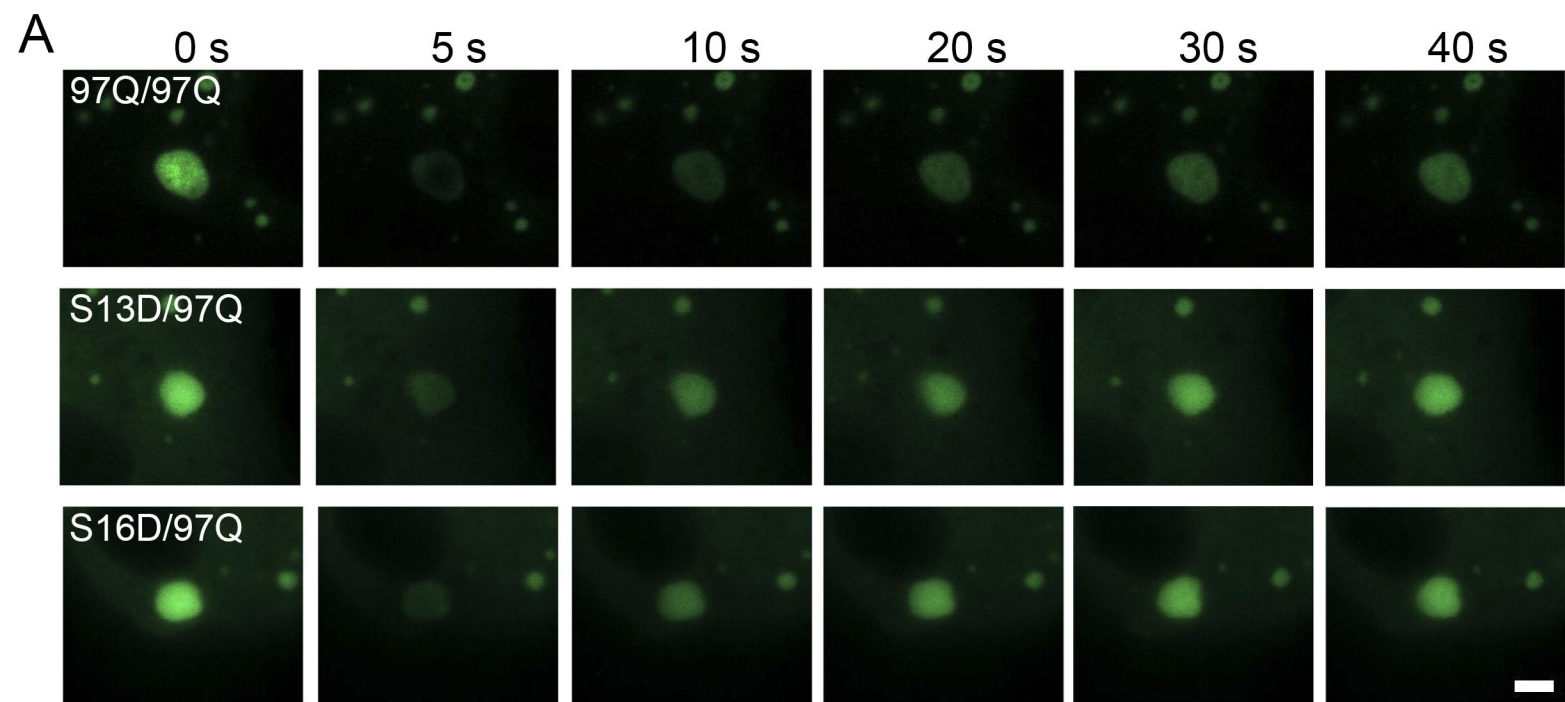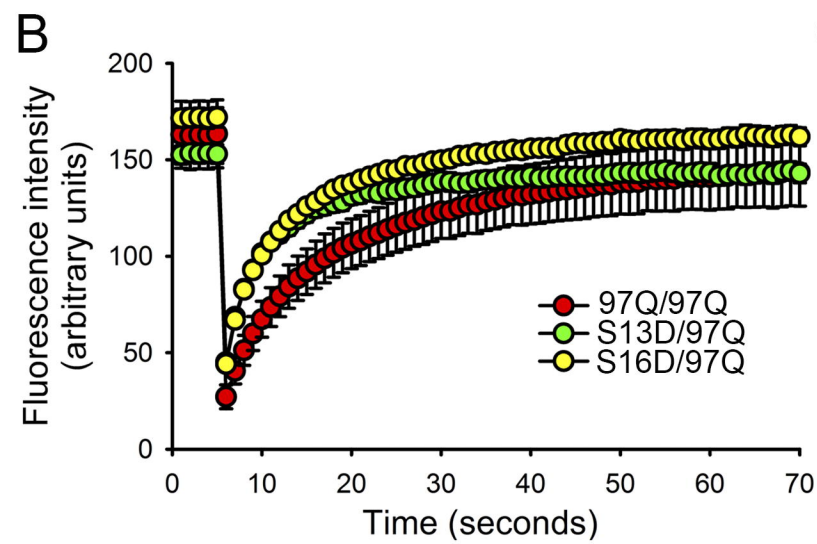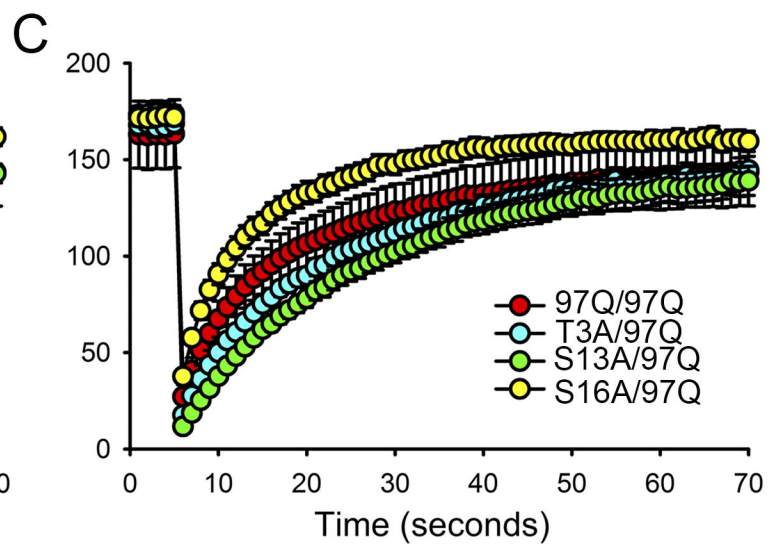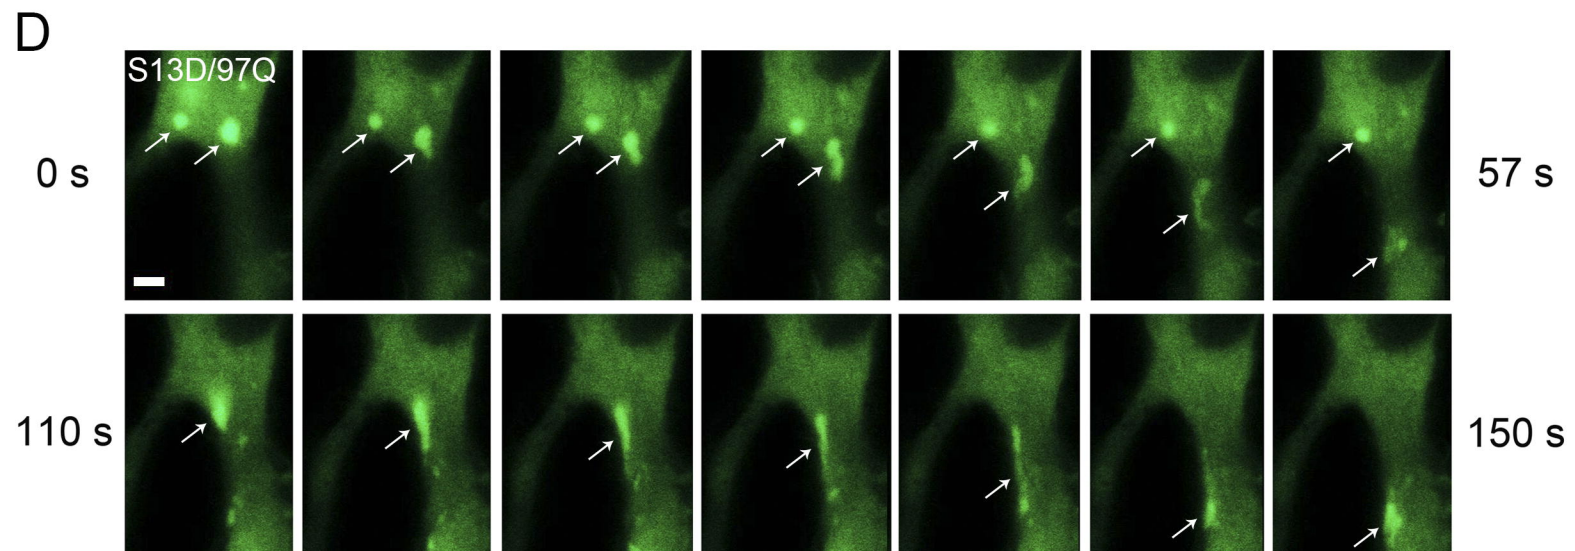

**A**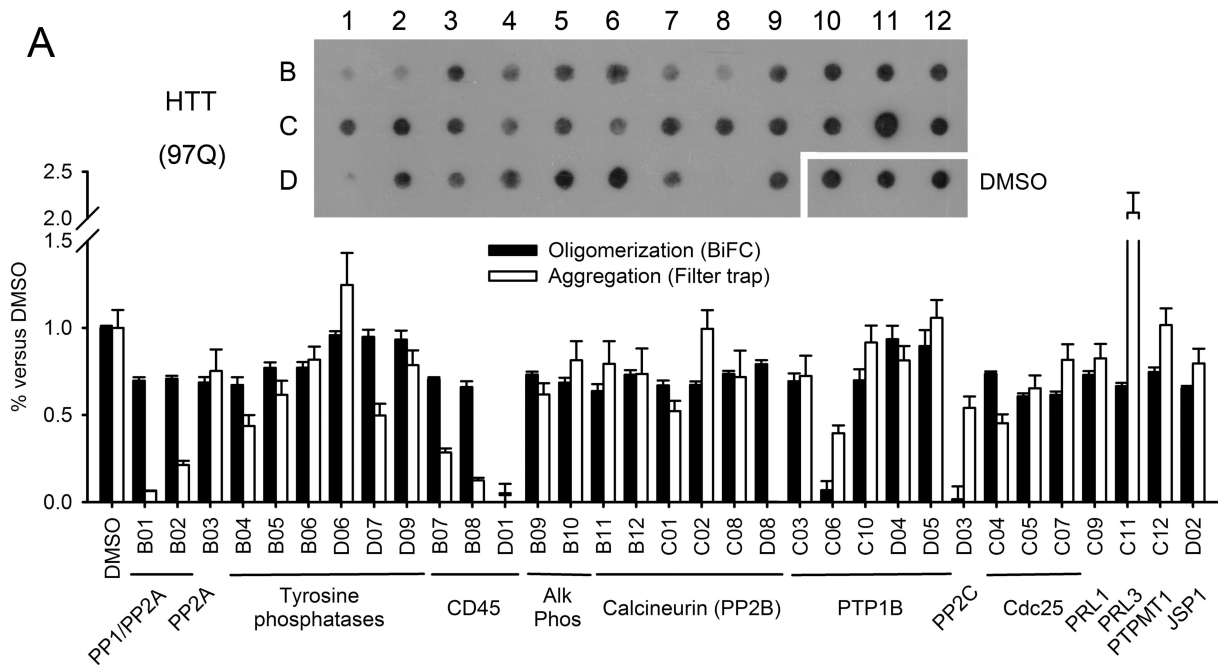**B**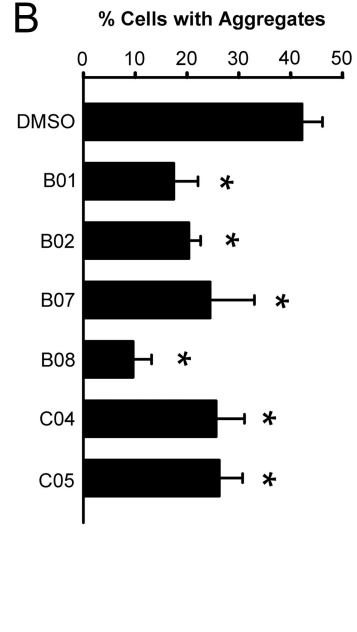

### Adult dopaminergic neurons

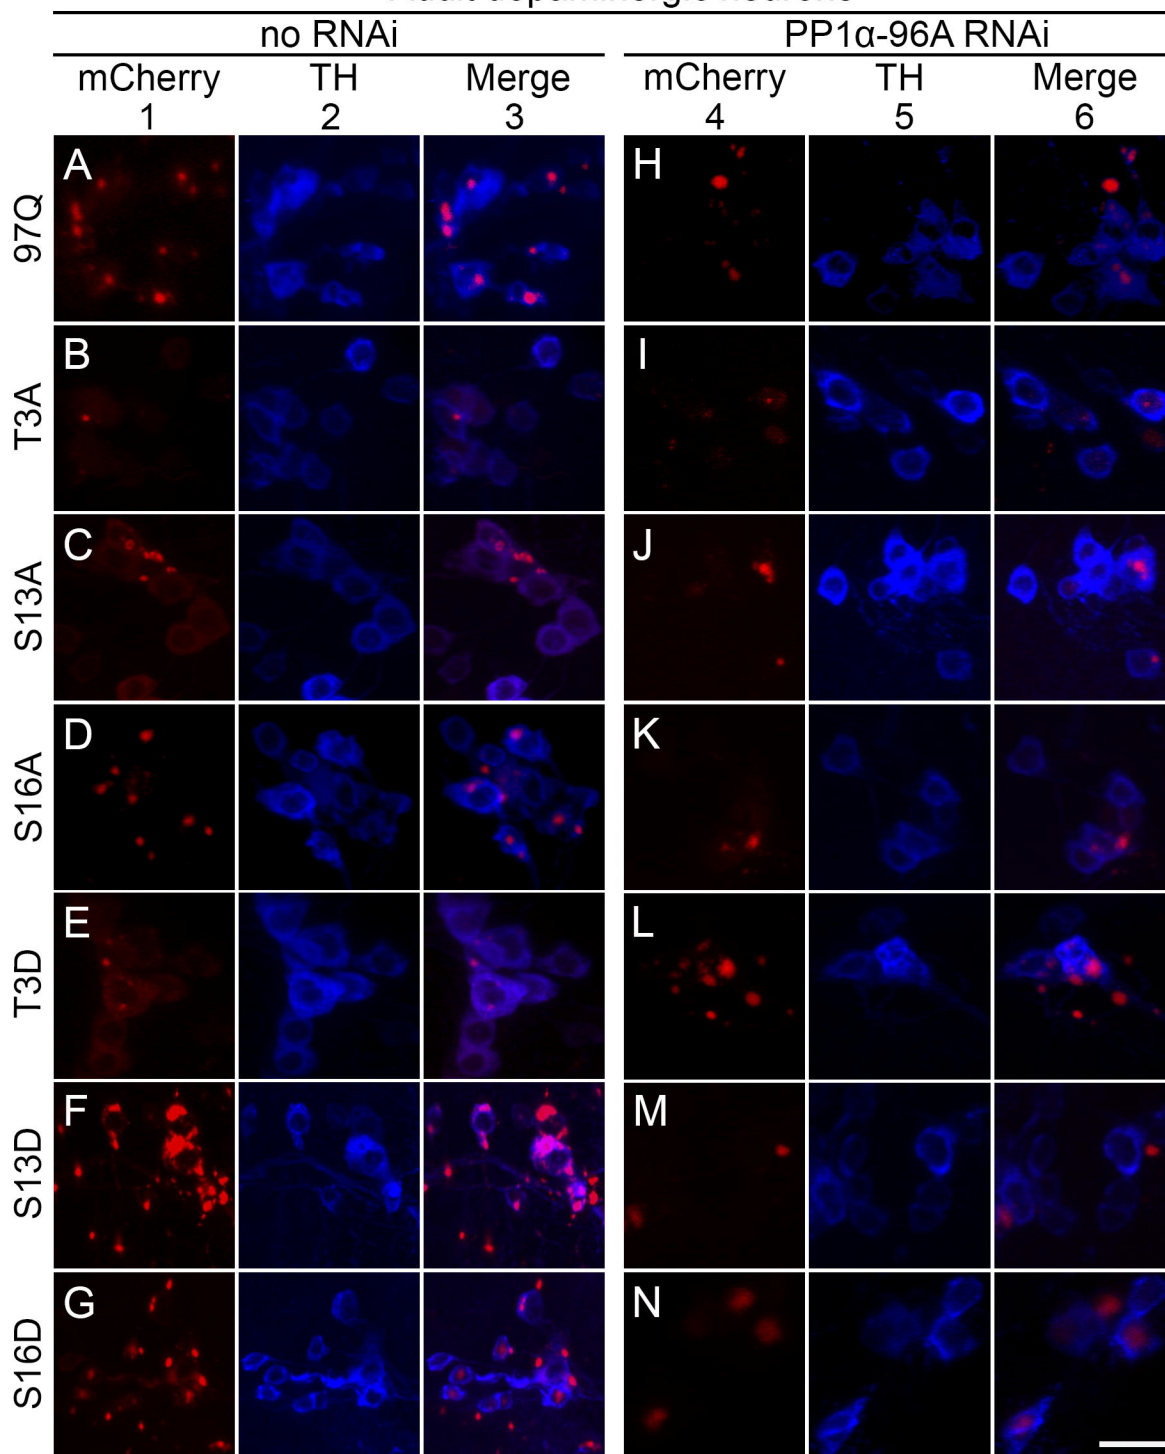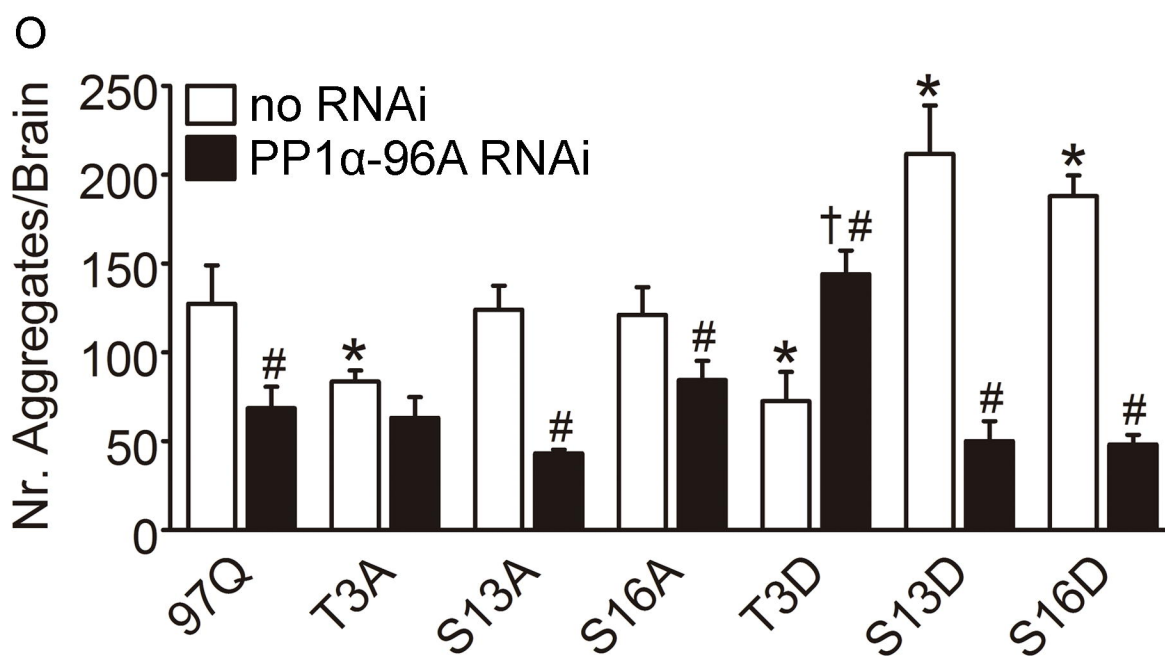

# Rh1GAL4 UAS-GFPninaC

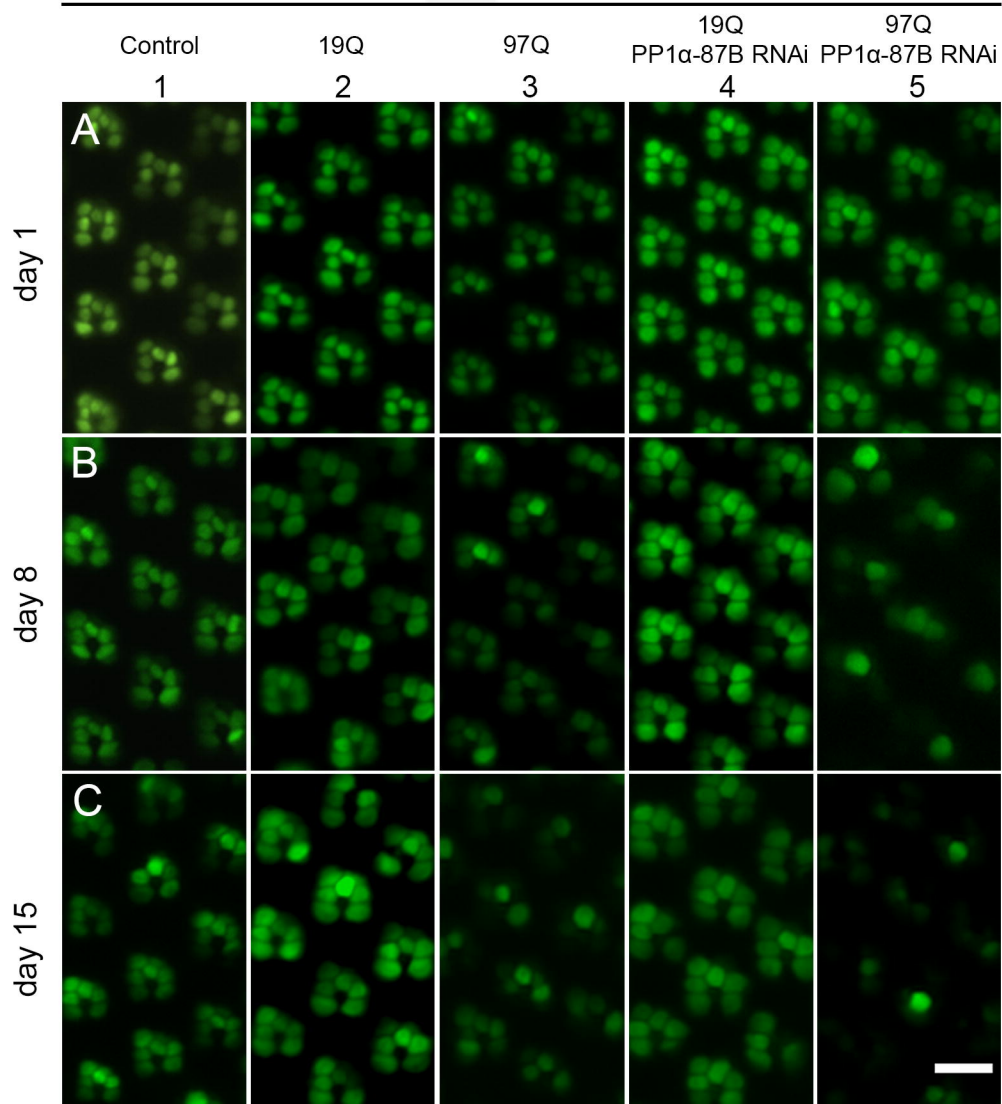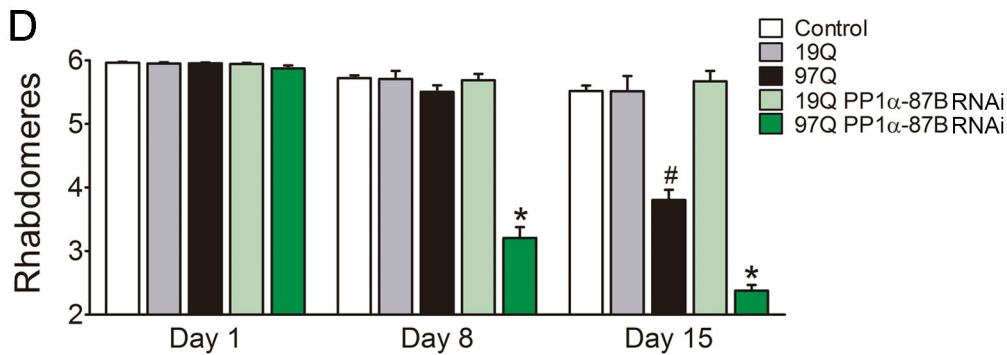

Source: http://biorxiv.org/content/10.1101/135954v1.full.pdf
